# Supplementary material for: IgG-Independent Co-aggregation of FcεRI and FcγRIIB Results in LYN- and SHIP1-Dependent Tyrosine Phosphorylation of FcγRIIB in Murine Bone Marrow-Derived Mast Cells
Source: Front Immunol. 2018 Aug 27;9:1937. doi: 10.3389/fimmu.2018.01937 (PMC6119721; doi:10.3389/fimmu.2018.01937)
Supplement: Supplementary file 2 [file Data_Sheet_2.xlsx]

## Sheet: Tabelle1
Proteins	Gene names	Amino acid	Positions within proteins	av 20/ctrl	av 2000/ctrl	av 2000/20
P00520;Q4JIM5	Abl1;Abl2	Y	393;439	0.774683	0.895877	1.1415
Q80XL6	Acad11	Y	323	1.27978	1.18229	0.957227
P60710;P63260	Actb;Actg1	Y	198;198	2.26367	3.45213	1.65098
P60710;P63260	Actb;Actg1	Y	294;294	1.0515	1.3702	1.15375
P60710;P63260;Q8BFZ3	Actb;Actg1;Actbl2	Y	166;166;167	1.21236	1.15215	1.08445
P60710;P63260;Q8BFZ3	Actb;Actg1;Actbl2	Y	169;169;170	1.09227	1.07311	1.03373
P60710;P63260;P68033;P68134	Actb;Actg1;Actc1;Acta1	Y	91;91;93;93	1.06662	1.00165	1.03414
P48999	Alox5	Y	516	1.26855	1.35233	1.19603
P48999	Alox5	Y	514	1.07814	1.26053	1.18185
P48999	Alox5	Y	95	1.03512	1.07431	1.09799
P97449	Anpep	Y	852	0.88526	0.844925	1.00235
P97384	Anxa11	Y	480	0.866885	0.946605	1.02685
P48036	Anxa5	Y	92	0.702873	0.825905	1.15133
P14824	Anxa6	Y	95	0.89755	1.21135	1.2271
P14824	Anxa6	Y	30	0.995438	1.10763	1.09915
P14824	Anxa6	Y	302	0.90071	0.96508	1.05085
O35643;Q9DBG3	Ap1b1;Ap2b1	Y	894;888	1.1274	1.13387	0.95442
Q9DBG3	Ap2b1	Y	737	1.15279	1.08825	0.918375
Q06335	Aplp2	Y	699	0.88366	1.05998	1.21443
Q8R5G7	Arap3	Y	298	5.43827	10.9616	2.26327
Q91YM2	Arhgap35	Y	1087	0.65489	0.944697	1.28977
Q91YM2	Arhgap35	Y	1105	1.31838	1.53406	1.1468
Q925I1	Atad3	Y	95	0.901152	1.52943	1.9038
O88398	Avil	Y	98	0.88279	1.43885	1.65055
Q6PAJ1	Bcr	Y	178	2.16005	1.66135	0.75785
P35991	Btk	Y	225	2.07115	2.45512	1.24817
P35991	Btk	Y	223	1.6442	2.01885	1.232
P35991	Btk	Y	344	1.41219	1.65538	1.1228
P35991	Btk	Y	551	0.658775	0.783728	0.927333
O55017	Cacna1b	Y	463	1.25333	1.21754	0.95936
P40124	Cap1	Y	31	2.22053	2.44433	1.21967
P40124	Cap1	Y	353	1.01761	1.07622	1.05254
Q9CZ42	Carkd	Y	81	0.93358	0.986713	1.04473
P24270	Cat	Y	231	0.999237	1.30917	1.24572
Q8K4F0	Cd226	Y	319	1.36735	1.696	1.1813
Q07763	Cd244	Y	344	1.24232	1.45711	1.3205
Q6SJQ0	Cd300a	Y	303	0.989324	1.21243	1.2158
Q18PI6	Cd84	Y	280	0.771237	0.932068	1.20958
O89103	Cd93	Y	620	0.987747	0.97343	1.00403
P11440;Q80YP0;P97377	Cdk1;Cdk3;Cdk2	Y	19;19;19	0.957409	1.10111	1.12297
P11440;Q80YP0;P97377	Cdk1;Cdk3;Cdk2	Y	15;15;15	0.942795	1.00779	1.04788
P11440;Q80YP0;P97377	Cdk1;Cdk3;Cdk2	Y	15;15;15	1.00949	1.04455	1.0369
E9Q2Z1	Cecr2	Y	424	0.781894	0.753022	0.915417
P18760	Cfl1	Y	140	1.33305	1.54114	1.16393
Q80XD1	Chn2	Y	75	7.59648	8.02604	0.924147
Q9DA19	Cir1	Y	46	0.848565	0.855225	0.9367
Q9QZE2	Clnk	Y	69	0.96505	0.921733	0.96255
Q68FD5	Cltc	Y	634	1.07882	1.42912	1.40303
Q9WUM4	Coro1c	Y	301	0.958367	1.02103	1.07229
P15089	Cpa3	Y	348	0.6889	0.65687	1.03693
P15089	Cpa3	Y	155	0.895223	0.977453	1.03481
P47941	Crkl	Y	251	4.27156	9.67077	2.1974
P47941	Crkl	Y	132	2.39357	2.6971	1.24382
P26955	Csf2rb	Y	861	0.702145	0.922855	1.19325
P26954	Csf2rb2	Y	861	0.802808	1.0518	1.17755
Q5SQX6;Q7TMB8	Cyfip2;Cyfip1	Y	108;108	1.34548	1.51637	1.17577
Q9QXT1	Dapp1	Y	139	4.65665	5.57503	1.21551
P31786	Dbi	Y	29	0.996258	1.29822	1.256
Q501J6;Q61656	Ddx17;Ddx5	Y	200;202	1.01357	1.16229	1.11474
P97465	Dok1	Y	361	1.05317	1.51589	1.09604
Q9JHU4	Dync1h1	Y	1008	1.84308	2.47405	1.36532
Q9Z188;Q61214	Dyrk1b;Dyrk1a	Y	273;321	1.03266	0.974692	0.995577
Q5U4C9;Q8BI55	Dyrk2;Dyrk4	Y	380;379	1.19664	1.20503	0.99639
Q61614	Ednra	Y	333	0.787744	0.973871	1.0761
P10126	Eef1a1	Y	177	0.973759	0.941328	0.896675
P10126;P62631	Eef1a1;Eef1a2	Y	141;141	0.956408	1.05283	1.07737
P10126;P62631	Eef1a1;Eef1a2	Y	29;29	0.998856	1.01681	1.00882
P17182	Eno1	Y	44	1.0132	1.20116	1.12042
P17182;P17183	Eno1;Eno2	Y	25;25	1.04509	1.01886	0.97858
Q3U7R1	Esyt1	Y	809	0.889438	0.944345	1.00938
P26040;P26041;P26043	Ezr;Msn;Rdx	Y	270;270;270	0.97053	1.00795	1.09694
P30558	F2r	Y	425	0.821454	0.963402	1.1379
P20491	Fcer1g	Y	65	2.86029	5.96813	2.00192
P20491	Fcer1g	Y	76	2.15366	4.39336	1.87197
P08101	Fcgr2	Y	326	1.66833	5.48578	3.32393
P70451	Fer	Y	715	1.69248	1.84529	0.82594
Q8K1B8	Fermt3	Y	372	1.48892	1.51612	1.08432
P16879	Fes	Y	456	1.14676	1.4063	1.306
Q80X90	Flnb	Y	904	1.38481	1.60027	1.14153
O35601	Fyb	Y	559	0.984933	0.84939	0.54149
Q00612	G6pdx	Y	401	0.956681	0.983882	1.03292
Q00612	G6pdx	Y	503	1.15093	1.16156	1.0213
P16858	Gapdh	Y	316	1.17279	1.04624	0.98524
Q6RFH4	Gcsam	Y	110	1.10751	1.44023	1.32143
Q6Y7W8	Gigyf2	Y	1174	1.60713	2.0506	1.24635
P08752	Gnai2	Y	61	1.20173	1.4742	1.2026
P11352	Gpx1	Y	147	0.929358	0.936988	1.09723
O89100	Grap2	Y	45	1.40571	1.70226	1.15913
Q9WV60;Q2NL51	Gsk3b;Gsk3a	Y	216;279	1.09052	0.968039	0.936135
P06339	H2-T23	Y	339	0.814696	0.966707	1.15885
Q99LI8	Hgs	Y	216	1.07543	1.1755	1.04289
Q3UDW8	Hgsnat	Y	249	0.84646	0.83903	0.968515
Q9QZR5;O88904	Hipk2;Hipk1	Y	361;352	0.915663	0.922783	1.07933
Q9ERH7	Hipk3	Y	359	0.978902	0.949562	1.03265
P62806	Hist1h4a	Y	89	1.21686	1.27117	1.05749
P07901	Hsp90aa1	Y	493	0.876345	1.1413	1.22615
P11499	Hsp90ab1	Y	484	1.07884	1.01168	1.02417
Q61316	Hspa4	Y	336	1.5061	1.29957	0.837137
Q9CQW9	Ifitm3	Y	27	0.887847	1.11771	1.24963
P14719	Il1rl1	Y	385	0.986855	1.01618	1.07668
P34902	Il2rg	Y	357	0.867793	1.02921	1.15675
P16382	Il4r	Y	603	0.845747	0.940243	1.19199
Q8K337	Inpp5b	Y	432	1.24009	1.0138	0.800185
Q9ES52	Inpp5d	Y	1166	3.92648	6.58089	1.5977
Q9ES52	Inpp5d	Y	868	1.93385	2.24595	1.1316
Q9ES52	Inpp5d	Y	1021	0.81901	0.51248	0.585555
Q6P549	Inppl1	Y	987	1.85433	3.0492	1.7458
Q9JKF1	Iqgap1	Y	654	1.08376	1.04489	1.01987
P81122	Irs2	Y	814	0.597005	0.583105	1.00755
P81122	Irs2	Y	734	0.502895	0.42735	0.948583
P81122	Irs2	Y	649	0.67277	0.559487	0.91105
P81122	Irs2	Y	671	0.460367	0.411173	0.82998
Q9Z0R6	Itsn2	Y	922	0.526576	1.19883	1.4705
Q62120	Jak2	Y	570	0.81062	0.817329	0.999317
Q9D3R6;Q3UMC0	Katnal2;Spata5	Y	294;393	1.06155	1.22185	1.0724
P33175	Kif5a	Y	276	0.841493	0.966791	1.06005
P05532	Kit	Y	573	0.956188	1.03374	1.2116
P05532	Kit	Y	902	0.721145	0.843803	1.1811
P05532	Kit	Y	732	0.843656	1.06966	1.12793
P05532	Kit	Y	723	0.874675	0.992037	1.11249
P05532	Kit	Y	723	0.78751	0.886224	1.08487
P05532	Kit	Y	825	0.735522	0.785871	1.08334
P05532	Kit	Y	706	0.897938	1.01428	1.07467
P05532	Kit	Y	571	0.998275	1.13072	1.07118
P05532	Kit	Y	612	0.765096	0.817609	1.03785
P05532	Kit	Y	732	0.811393	0.900857	0.989077
P05532	Kit	Y	556	0.801105	0.8037	0.899095
P05532	Kit	Y	581	0.86488	0.753415	0.860105
Q9JHL0	Lat2	Y	59	3.29474	6.95775	2.35228
Q9JHL0	Lat2	Y	98	1.21616	1.88053	1.4441
Q9JHL0	Lat2	Y	98	17.2961	16.3161	1.01703
P06240;P39688;Q04736	Lck;Fyn;Yes1	Y	394;420;424	2.03485	3.51287	1.12756
Q61233	Lcp1	Y	28	1.34198	2.14202	1.57188
Q61233;Q99K51	Lcp1;Pls3	Y	124;127	0.952135	0.990307	1.06578
P06151	Ldha	Y	239	1.06591	1.1681	1.08661
O08573	Lgals9	Y	70	0.874285	1.04288	1.187
Q64281	Lilrb4	Y	300	1.0934	1.21685	1.01173
Q8K1T1	Lrrc25	Y	289	0.748445	1.08875	1.0969
P25911	Lyn	Y	397	2.13509	4.85769	1.41506
P25911	Lyn	Y	473	1.18964	1.34525	1.16793
P25911	Lyn	Y	265	1.05229	1.127	1.0176
P25911	Lyn	Y	316	1.07465	1.1199	1.0101
P25911;P16277	Lyn;Blk	Y	194;182	1.16351	1.14692	1.05931
P25911;P16277	Lyn;Blk	Y	193;181	1.3098	1.0578	0.983597
Q8BW75	Maob	Y	255	0.811135	0.962595	1.07502
P63085	Mapk1	Y	185	5.21194	4.39963	0.799175
P63085	Mapk1	Y	185	23.4359	14.143	0.792903
P47811	Mapk14	Y	182	10.1329	8.25717	0.822323
Q63844	Mapk3	Y	205	6.71158	6.29258	0.953815
Q63844	Mapk3	Y	205	26.0524	22.4249	0.944497
Q9WVS8	Mapk7	Y	221	1.29157	1.45383	1.19607
Q91Y86;Q61831	Mapk8;Mapk10	Y	185;223	5.2066	5.4562	1.03401
Q9WTU6	Mapk9	Y	185	1.94265	2.18575	1.23775
Q9WTU6	Mapk9	Y	185	4.53355	5.60239	1.13001
Q922T2	Mfap3	Y	277	0.821975	1.05645	1.26335
P19467	Muc13	Y	562	0.714024	0.766169	1.09365
Q8VDD5	Myh9	Y	754	0.74038	0.855975	1.02551
O55033	Nck2	Y	110	2.40817	1.65703	0.712697
Q8BZW8	Nhlrc2	Y	403	0.995981	1.12844	0.945343
Q62422	Ostf1	Y	111	1.25552	1.27358	0.987256
Q9Z1M0	P2rx7	Y	382	0.580655	0.71836	1.29535
P63005	Pafah1b1	Y	28	1.11845	1.10156	1.01802
Q3U1F9	Pag1	Y	224	1.0943	1.3082	1.00835
Q3U1F9	Pag1	Y	314	1.52825	1.41839	0.854744
Q3U1F9	Pag1	Y	356	1.23198	1.28592	0.845474
Q3U1F9	Pag1	Y	165	1.00544	0.809892	0.772342
Q3U1F9	Pag1	Y	414	0.79469	0.38678	0.487635
O88428	Papss2	Y	21	1.32777	1.49175	1.19005
Q08481	Pecam1	Y	702	1.21648	1.38775	1.14405
Q9DBJ1	Pgam1	Y	26	0.888865	1.124	1.25645
Q9DBJ1;O70250	Pgam1;Pgam2	Y	92;92	1.04516	0.973869	0.95742
O35904	Pik3cd	Y	523	0.878776	0.815276	0.85787
P26450	Pik3r1	Y	580	1.02148	1.0652	0.976183
P26450	Pik3r1	Y	452	1.30117	0.986201	0.746577
P26450;Q64143	Pik3r1;Pik3r3	Y	467;199	1.0103	0.972787	0.979055
P52480	Pkm	Y	148	1.0449	1.21601	1.13222
Q62077	Plcg1	Y	783	1.7674	1.91493	1.07308
Q8CIH5	Plcg2	Y	1217	2.23691	1.95923	0.922637
Q8CIH5	Plcg2	Y	1245	1.5509	1.23967	0.765815
Q9QXS1	Plec	Y	2833	0.798653	0.642347	0.902968
Q9DC11	Plxdc2	Y	512	0.824717	1.04499	1.24092
P35700	Prdx1	Y	10	0.751445	0.932035	1.101
P68404	Prkcb	Y	195	0.7743	0.840885	1.09065
P28867	Prkcd	Y	311	14.35	16.6419	1.18218
P28867	Prkcd	Y	332	1.82953	1.26449	0.71603
Q61136	Prpf4b	Y	849	1.09196	1.07764	1.0268
P49722	Psma2	Y	76	0.907105	0.97968	1.14195
P49722	Psma2	Y	57	1.10368	1.05842	0.88335
P17225	Ptbp1	Y	126	1.01053	1.10077	1.068
Q8BHD7	Ptbp3	Y	98	1.25611	1.69346	1.34579
Q9QVP9	Ptk2b	Y	579	2.83095	1.70015	0.614465
P35235	Ptpn11	Y	546	1.11529	2.02592	1.7251
P35235	Ptpn11	Y	62	0.911245	0.936959	1.02121
Q61152	Ptpn18	Y	381	4.86533	5.64468	1.05995
P29351	Ptpn6	Y	64	5.23988	8.68192	1.5634
P29351	Ptpn6	Y	536	1.04128	1.67325	1.54795
P29351	Ptpn6	Y	564	1.03316	1.5332	1.33364
P29351	Ptpn6	Y	301	0.92568	0.884085	1.10655
P18052	Ptpra	Y	825	0.905673	0.88691	0.947673
P49446	Ptpre	Y	695	1.31759	1.32681	1.0169
Q8R143	Pttg1ip	Y	171	1.53062	1.90656	1.14602
Q8CI94	Pygb	Y	197	0.93696	1.04169	1.08565
P51150	Rab7a	Y	183	0.786405	0.941715	1.071
Q9ERU9	Ranbp2	Y	1349	1.11035	1.18007	1.05238
Q9WUB0	Rbck1	Y	328	1.98046	2.98369	1.4874
P47911	Rpl6	Y	290	1.1796	1.20285	1.02896
P57725;P59808	Samsn1;Sash1	Y	179;563	1.98172	2.52258	1.38827
Q8K352	Sash3	Y	189	1.24006	1.5946	1.27427
Q60604	Scin	Y	102	1.26915	2.8052	2.2556
P98083	Shc1	Y	423	2.03273	2.86477	1.60655
Q3UUV5	Skap1	Y	142	0.949825	1.2039	1.2055
Q3UND0	Skap2	Y	151	0.92531	1.05927	1.11722
Q3UND0	Skap2	Y	197	1.18171	1.14262	0.961482
Q3UND0	Skap2	Y	237	0.51221	0.20881	0.495705
Q924N4	Slc12a6	Y	156	0.844885	0.83605	1.093
P51881	Slc25a5	Y	195	0.88949	1.1687	1.3247
Q8CFE6	Slc38a2	Y	41	0.94489	1.1598	1.216
Q62376	Snrnp70	Y	126	1.0517	1.20865	1.0737
Q924S8	Spred1	Y	293	0.927434	0.980785	1.01544
P05480	Src	Y	424	2.43401	5.49745	1.72752
Q9JM90	Stap1	Y	170	4.12922	2.81035	0.650132
P42227	Stat3	Y	705	1.08136	1.11657	1.06634
P42230	Stat5a	Y	694	1.08936	1.1665	0.994152
P42232	Stat5b	Y	699	1.22743	1.2195	0.901852
P70452	Stx4	Y	115	0.824512	0.992993	1.2518
P70452	Stx4	Y	251	0.86768	0.94461	1.20717
Q6A028	Swap70	Y	517	2.81257	4.25091	1.51465
P48025	Syk	Y	290	2.51423	4.31165	1.38656
P48025	Syk	Y	520	8.27226	11.1241	1.3051
P48025	Syk	Y	317	1.96701	2.72203	1.24535
P48025	Syk	Y	346	2.8019	3.50427	1.17881
P48025	Syk	Y	624	42.0425	44.9443	1.14446
P48025	Syk	Y	519	20.2697	22.2075	1.03297
P48025	Syk	Y	342	2.74284	2.8036	1.01462
P24604	Tec	Y	518	3.05339	3.36731	0.846654
Q8CGB6	Tenc1	Y	483	0.952575	1.19375	1.45425
P21981	Tgm2	Y	617	1.00864	1.04721	1.0758
P21981	Tgm2	Y	369	1.04415	1.06683	0.969672
P26039	Tln1	Y	26	1.13649	1.41096	1.27285
P26039	Tln1	Y	70	0.870205	0.97042	1.108
Q8C4Q9	Tmem154	Y	160	1.00341	1.12178	1.07036
Q91YT8	Tmem63a	Y	774	0.940365	0.98235	1.06495
P21845	Tpsb2	Y	263	0.815165	0.716135	1.00045
P21845	Tpsb2	Y	97	0.97256	0.89915	0.860235
P05213;P68368;P68373;P68369;P05214;Q3UX10;Q9JJZ2	Tuba1b;Tuba4a;Tuba1c;Tuba1a;Tuba3a;Tubal3;Tuba8	Y	399;399;399;399;399;406;399	0.88734	1.2014	1.14735
P42682	Txk	Y	420	0.901202	1.10742	1.22595
P42682	Txk	Y	91	0.752979	1.2429	1.1903
P42682	Txk	Y	148	1.09765	0.972983	0.99478
P42682	Txk	Y	214	1.01112	0.87145	0.827705
Q9JMH6	Txnrd1	Y	245	1.02063	1.02586	1.00163
O54885	Tyrobp	Y	92	1.23633	1.33474	1.13582
Q8BGG7	Ubash3b	Y	8	0.791477	24.8657	29.9844
Q9Z1Q9	Vars	Y	468	1.00686	1.08979	1.08767
P70460	Vasp	Y	39	1.09121	1.07594	1.04625
Q62465	Vat1	Y	253	1.02453	1.20986	1.14238
P27870	Vav1	Y	826	1.02669	0.726439	0.661512
Q64727	Vcl	Y	692	0.79721	0.888225	1.16872
P20152	Vim	Y	53	0.853164	1.10227	1.3227
P20152	Vim	Y	117	0.987275	1.17205	1.10017
P70315	Was	Y	293	0.913622	0.983681	1.09604
O88342	Wdr1	Y	72	1.08709	1.17567	1.08043
O88342	Wdr1	Y	238	1.07333	1.08387	0.97754
P0DP28;P0DP27;P0DP26		Y	100;100;100	2.09665	2.8306	1.38642
Q3U7U4		Y	119	0.857641	0.906767	1.08212
