# Supplementary material for: IgG-Independent Co-aggregation of FcεRI and FcγRIIB Results in LYN- and SHIP1-Dependent Tyrosine Phosphorylation of FcγRIIB in Murine Bone Marrow-Derived Mast Cells
Source: Front Immunol. 2018 Aug 27;9:1937. doi: 10.3389/fimmu.2018.01937 (PMC6119721; doi:10.3389/fimmu.2018.01937)
Supplement: Supplementary file 3 [file Data_Sheet_3.xlsx]

## Sheet: Tabelle1
columns	Experiment No.	description	referred to as	legend	light label (L)	intermediate label (M)	heavy label (H)	remarks
columns A-C	Experiment 1		Ex1	Ratio "label" normalised Ex1	control	20	2000
columns D-F	Experiment 1	technical replicate	Ex2	Ratio "label" normalised Ex2	control	20	2000
columns G-I	Experiment 2		Ex3	Ratio "label" normalised Ex3	control	20	2000
columns J-L	Experiment 2	technical replicate	Ex4	Ratio "label" normalised Ex4	control	20	2000
columns M-O	Experiment 3		Ex5	Ratio "label" normalised Ex5	20	2000	control
columns P-R	Experiment 3	technical replicate	Ex6	Ratio "label" normalised Ex6	20	2000	control
columns S-U	Experiment 3			"condition" Ex5				recalculated values for Experiment 3 in order to represent the same biological condition as experiments 1 and 2
columns V-X	Experiment 3	technical replicate		"condition" Ex6
average 20/ctrl		mean of columns A,D,G,J,S,T if a triplet from Ex1-Ex6 exhibited all three ratios
average 2000/ctrl		mean of columns B,E,H,K,T,W if a triplet from Ex1-Ex6 exhibited all three ratios
average 2000/20		mean of columns C,F,I,L,U,Xif a triplet from Ex1-Ex6 exhibited all three ratios
The remaining headers are derived from the MaxQuant output .txt file
The order of the columns was taken from the Perseus output

## Sheet: Tabelle2
Ratio M/L normalized Ex1	Ratio H/L normalized Ex1	Ratio H/M normalized Ex1	Ratio M/L normalized Ex2	Ratio H/L normalized Ex2	Ratio H/M normalized Ex2	Ratio M/L normalized Ex3	Ratio H/L normalized Ex3	Ratio H/M normalized Ex3	Ratio M/L normalized Ex4	Ratio H/L normalized Ex4	Ratio H/M normalized Ex4	Ratio M/L normalized Ex5	Ratio H/L normalized Ex5	Ratio H/M normalized Ex5	Ratio M/L normalized Ex6	Ratio H/L normalized Ex6	Ratio H/M normalized Ex6	20/ctrl Ex5	2000/ctrl Ex5	2000/20 Ex5	20/ctrl Ex6	2000/ctrl Ex6	2000/20 Ex6	av 20/ctrl	av 2000/ctrl	av 2000/20	Amino acid	Charge	Reverse	Potential contaminant	Multiplicity	Localization prob	PEP	Score	Delta score	Score for localization	Mass error [ppm]	Intensity	Intensity L	Intensity M	Intensity H	Position	Proteins	Positions within proteins	Leading proteins	Protein	Protein names	Gene names	Sequence window
0.73336	0.88073	1.1492	0.87219	1.0501	1.2385	0.6647	0.64587	1.0045	0.75089	0.91685	1.1842	1.1425	1.2381	1.0472	1.1301	1.2206	1.079	0.807689	0.954927	1.1425	0.819269	0.926784	1.1301	0.774683	0.895877	1.1415	Y	3			___1	0.997063	1.16001e-16	162.31	132.54	162.31	-0.26632	33702000	10835000	11623000	11244000	393	P00520;Q4JIM5	393;439	P00520	P00520	Tyrosine-protein kinase ABL1;Abelson tyrosine-protein kinase 2	Abl1;Abl2	KVADFGLSRLMTGDTYTAHAGAKFPIKWTAP
1.058	0.82877	0.76519	0.92194	0.90005	1.0523	2.1062	2.194	1.3233	1.1519	1.2151	1.028	0.79661	0.79126	1.0017	0.77796	0.84975	1.0444	1.26381	0.998303	0.79661	1.17682	0.957488	0.77796	1.27978	1.18229	0.957227	Y	2			___1	0.992374	7.27109e-05	97.452	60.446	94.363	-0.31234	23284000	9054800	6839000	7389800	323	Q80XL6	323	Q80XL6	Q80XL6	Acyl-CoA dehydrogenase family member 11	Acad11	MALSFFKLAGISQGVYRRYLMGNNSSEDSFL
3.5025	4.3463	1.5453	2.2232	3.0359	1.3276	NaN	NaN	NaN	2.5432	3.353	1.3049	2.1389	0.58485	0.25547	1.9382	0.7465	0.38298	1.70984	3.91435	2.1389	1.33958	2.6111	1.9382	2.26367	3.45213	1.65098	Y	2			___1	0.997377	0.000364593	106.6	66.636	67.214	-0.26424	17428000	3135700	8245100	6047200	198	P60710;P63260	198;198	P60710	P60710	Actin, cytoplasmic 1;Actin, cytoplasmic 1, N-terminally processed;Actin, cytoplasmic 2;Actin, cytoplasmic 2, N-terminally processed	Actb;Actg1	RDLTDYLMKILTERGYSFTTTAEREIVRDIK
0.94385	1.0462	1.0449	0.90495	1.0788	1.1857	1.268	1.741	1.2298	1.0892	1.6148	1.1546	NaN	NaN	NaN	NaN	NaN	NaN	NaN	NaN	NaN	NaN	NaN	NaN	1.0515	1.3702	1.15375	Y	2			___1	0.999908	4.95786e-16	130.83	109.88	130.83	-0.19035	20260000	5981700	7554700	6724000	294	P60710;P63260	294;294	P60710	P60710	Actin, cytoplasmic 1;Actin, cytoplasmic 1, N-terminally processed;Actin, cytoplasmic 2;Actin, cytoplasmic 2, N-terminally processed	Actb;Actg1	FNSIMKCDVDIRKDLYANTVLSGGTTMYPGI
NaN	NaN	NaN	1.0108	1.3708	1.3693	1.7043	1.4042	1.1828	1.2583	1.1124	1.0964	0.81901	0.90825	1.1059	0.95472	1.0128	1.0319	1.10102	0.904241	0.81901	0.987362	0.969086	0.95472	1.21236	1.15215	1.08445	Y	4			___1	0.999958	1.30542e-23	130.81	106.4	130.81	-0.026214	173170000	66622000	45397000	61146000	166	P60710;P63260;Q8BFZ3	166;166;167	P60710;Q8BFZ3	P60710	Actin, cytoplasmic 1;Actin, cytoplasmic 1, N-terminally processed;Actin, cytoplasmic 2;Actin, cytoplasmic 2, N-terminally processed;Beta-actin-like protein 2	Actb;Actg1;Actbl2	IVMDSGDGVTHTVPIYEGYALPHAILRLDLA
1.1033	1.2335	1.1938	1.005	1.2782	1.265	1.1527	1.0796	1.0031	1.2601	1.1696	1.0826	0.91504	1.056	1.161	0.74286	0.9212	1.2248	0.94697	0.861326	0.91504	1.08554	0.81646	0.74286	1.09227	1.07311	1.03373	Y	3			___1	0.97961	1.53684e-21	129.52	92.403	102.69	-0.43304	228340000	89611000	63295000	75431000	169	P60710;P63260;Q8BFZ3	169;169;170	P60710;Q8BFZ3	P60710	Actin, cytoplasmic 1;Actin, cytoplasmic 1, N-terminally processed;Actin, cytoplasmic 2;Actin, cytoplasmic 2, N-terminally processed;Beta-actin-like protein 2	Actb;Actg1;Actbl2	DSGDGVTHTVPIYEGYALPHAILRLDLAGRD
1.1043	0.91633	0.81414	1.0418	0.8374	0.79464	1.3323	1.0656	0.96405	1.2242	0.96636	0.96353	1.3633	1.1069	0.85492	1.3052	1.2599	0.94829	0.903424	1.1697	1.3633	0.793714	1.05453	1.3052	1.06662	1.00165	1.03414	Y	3			___1	0.994192	3.42093e-05	115.57	85.368	105.17	0.12251	58529000	17863000	23058000	17607000	91	P60710;P63260;P68033;P68134	91;91;93;93	P60710;P68033	P60710	Actin, cytoplasmic 1;Actin, cytoplasmic 1, N-terminally processed;Actin, cytoplasmic 2;Actin, cytoplasmic 2, N-terminally processed;Actin, alpha cardiac muscle 1;Actin, alpha skeletal muscle	Actb;Actg1;Actc1;Acta1	ITNWDDMEKIWHHTFYNELRVAPEEHPTLLT;VTNWDDMEKIWHHTFYNELRVAPEEHPVLLT
NaN	NaN	NaN	0.86754	1.1387	1.1712	1.2765	1.0369	1.2708	1.6616	1.8814	1.1461	NaN	NaN	NaN	NaN	NaN	NaN	NaN	NaN	NaN	NaN	NaN	NaN	1.26855	1.35233	1.19603	Y	2			___1	0.999939	0.000228375	97.798	70.742	97.798	0.05775	2434300	638350	859750	936220	516	P48999	516	P48999	P48999	Arachidonate 5-lipoxygenase	Alox5	EEDQELQDFVKDVYVYGMRGKKASGFPKSIK
0.87849	0.94626	1.1372	0.91349	0.98546	1.1283	1.319	1.532	1.2314	1.2016	1.5784	1.2305	NaN	NaN	NaN	NaN	NaN	NaN	NaN	NaN	NaN	NaN	NaN	NaN	1.07814	1.26053	1.18185	Y	2			___1	0.999858	5.12225e-05	111.74	69.401	111.74	0.094982	6894400	2301900	2371300	2221200	514	P48999	514	P48999	P48999	Arachidonate 5-lipoxygenase	Alox5	VVEEDQELQDFVKDVYVYGMRGKKASGFPKS
0.87436	0.91722	1.1208	0.84302	0.99421	1.2299	1.1928	1.1638	1.1462	1.2472	1.2992	1.1032	0.95274	1.0156	0.9449	1.0351	0.93572	0.98707	0.98464	1.05831	0.95274	1.0687	1.0131	1.0351	1.03512	1.07431	1.09799	Y	2			___1	0.999974	0.000536052	84.365	56.354	84.365	-0.25882	62925000	20583000	21367000	20975000	95	P48999	95	P48999	P48999	Arachidonate 5-lipoxygenase	Alox5	DWYLKYITLKTPHGDYIEFPCYRWITGEGEI
0.90737	0.854	0.9994	0.86315	0.83585	1.0053	NaN	NaN	NaN	NaN	NaN	NaN	NaN	NaN	NaN	NaN	NaN	NaN	NaN	NaN	NaN	NaN	NaN	NaN	0.88526	0.844925	1.00235	Y	2			___1	0.999991	2.13591e-09	150.49	110.86	138.45	0.2349	5444600	1923200	2036100	1485300	852	P97449	852	P97449	P97449	Aminopeptidase N	Anpep	VWILNRYLSYTLNPDYIRKQDTTSTIISIAS
0.92144	0.98972	1.0871	0.81233	0.90349	0.9666	NaN	NaN	NaN	NaN	NaN	NaN	NaN	NaN	NaN	NaN	NaN	NaN	NaN	NaN	NaN	NaN	NaN	NaN	0.866885	0.946605	1.02685	Y	3			___1	0.997788	8.53325e-12	136.33	95.954	118.52	0.0036641	3236300	1134400	1205800	896070	480	P97384	480	P97384	P97384	Annexin A11	Anxa11	LDIRAEYKRMYGKSLYHDITGDTSGDYRKIL
0.88564	1.0524	1.2054	0.88439	1.0177	1.1543	0.81774	0.69633	1.0558	0.98552	1.0297	1.0393	1.2275	3.3896	1.6957	1.2257	2.8659	1.7557	0.29502	0.589727	1.2275	0.348931	0.569573	1.2257	0.702873	0.825905	1.15133	Y	2			___1	1	0.000148169	120.15	42.423	120.15	0.20811	47475000	11516000	16768000	19191000	92	P48036	92	P48036	P48036	Annexin A5	Anxa5	KLIVAMMKPSRLYDAYELKHALKGAGTDEKV
0.93904	1.19	1.1757	0.85606	1.2327	1.2785	NaN	NaN	NaN	NaN	NaN	NaN	NaN	NaN	NaN	NaN	NaN	NaN	NaN	NaN	NaN	NaN	NaN	NaN	0.89755	1.21135	1.2271	Y	3			___1	1	0.00411505	65.495	44.246	65.043	-0.31922	4662300	1679800	1617700	1364900	95	P14824	95	P14824	P14824	Annexin A6	Anxa6	GKFERLIVNLMRPLAYCDAKEIKDAISGVGT
0.96126	1.1275	1.1781	0.90572	1.134	1.2495	0.99814	1.1263	1.1474	1.2577	1.4544	1.2552	0.95037	1.188	1.2089	0.81432	0.99201	1.0242	0.841751	0.827198	0.95037	1.00805	0.976372	0.81432	0.995438	1.10763	1.09915	Y	3			___1	0.971224	5.43569e-97	231.93	205.98	231.93	0.11151	190070000	61888000	63429000	64751000	30	P14824	30	P14824	P14824	Annexin A6	Anxa6	HDFPEFDANQDAEALYTAMKGFGSDKESILE
0.93763	1.0175	1.0735	0.86379	0.91266	1.0282	NaN	NaN	NaN	NaN	NaN	NaN	NaN	NaN	NaN	NaN	NaN	NaN	NaN	NaN	NaN	NaN	NaN	NaN	0.90071	0.96508	1.05085	Y	2			___1	0.779305	0.00798958	68.787	24.67	68.787	-0.026472	3433500	1143000	1219900	1070700	302	P14824	302	P14824	P14824	Annexin A6	Anxa6	LDIREIFRTKYEKSLYSMIKNDTSGEYKKAL
1.4198	1.5593	1.0962	0.83499	0.70844	0.81264	NaN	NaN	NaN	NaN	NaN	NaN	NaN	NaN	NaN	NaN	NaN	NaN	NaN	NaN	NaN	NaN	NaN	NaN	1.1274	1.13387	0.95442	Y	3			___1	0.999892	0.00110918	92.151	43.071	92.151	-0.64916	2178100	833250	779620	565190	888	O35643;Q9DBG3	894;888	O35643;Q9DBG3	Q9DBG3	AP-1 complex subunit beta-1;AP-2 complex subunit beta	Ap1b1;Ap2b1	IFTVAKRNVEGQDMLYQSLKLTNGIWVLAEL;VYTIAKRNVEGQDMLYQSLKLTNGIWILAEL
1.3056	1.342	1.0278	0.99998	0.83449	0.80895	NaN	NaN	NaN	NaN	NaN	NaN	NaN	NaN	NaN	NaN	NaN	NaN	NaN	NaN	NaN	NaN	NaN	NaN	1.15279	1.08825	0.918375	Y	3			___1	1	0.000734664	92.295	60.639	88.163	-0.34075	2787300	1069600	1054700	662960	737	Q9DBG3	737	Q9DBG3	Q9DBG3	AP-2 complex subunit beta	Ap2b1	GLEISGTFTHRQGHIYMEMNFTNKALQHMTD
0.85497	1.1222	1.4851	NaN	NaN	NaN	0.88145	0.85841	1.1512	0.97431	1.4792	1.4188	0.95727	1.2107	1.0934	1.0598	1.1343	1.0805	0.825968	0.914578	0.95727	0.881601	0.925497	1.0598	0.88366	1.05998	1.21443	Y	2			___1	0.850456	1.13305e-05	111.79	82.676	111.79	-0.1485	11397000	3493700	3971000	3932000	699	Q06335	699	Q06335	Q06335	Amyloid-like protein 2	Aplp2	RHLNKMQNHGYENPTYKYLEQMQI_______
NaN	NaN	NaN	NaN	NaN	NaN	8.5377	15.701	1.9021	6.5398	13.739	2.2408	2.6469	0.80821	0.2903	NaN	NaN	NaN	1.2373	3.44471	2.6469	NaN	NaN	NaN	5.43827	10.9616	2.26327	Y	2			___1	1	0.00104178	120.77	73.149	120.77	0.11542	12081000	1720800	6190300	4169700	298	Q8R5G7	298	Q8R5G7	Q8R5G7	Arf-GAP with Rho-GAP domain, ANK repeat and PH domain-containing protein 3	Arap3	PLLSGWLDKLSPQGNYVFQRRFVQFNGRSLM
0.57934	0.78963	1.3394	0.49611	0.70206	1.3133	0.88922	1.3424	1.2166	NaN	NaN	NaN	NaN	NaN	NaN	NaN	NaN	NaN	NaN	NaN	NaN	NaN	NaN	NaN	0.65489	0.944697	1.28977	Y	3			___1	0.953029	6.0495e-36	152.4	131.37	137.38	-0.14406	8431500	3485300	2249300	2696900	1087	Q91YM2	1087	Q91YM2	Q91YM2	Rho GTPase-activating protein 35	Arhgap35	SSSPWMPQDGFDPSDYAEPMDAVVKPRNEEE
1.1051	1.2756	1.0981	1.0748	1.1662	1.0978	1.6104	1.8606	1.1243	1.8302	2.0242	1.1322	1.2156	0.86431	0.6911	1.2128	0.88278	0.6989	1.15699	1.44697	1.2156	1.13279	1.43082	1.2128	1.31838	1.53406	1.1468	Y	3			___1	0.998262	2.37483e-52	201.9	156.94	155.26	0.24304	230980000	69118000	92133000	69730000	1105	Q91YM2	1105	Q91YM2	Q91YM2	Rho GTPase-activating protein 35	Arhgap35	PMDAVVKPRNEEENIYSVPHDSTQGKIITIR
NaN	NaN	NaN	NaN	NaN	NaN	NaN	NaN	NaN	NaN	NaN	NaN	1.0506	1.0002	1.084	2.757	1.2461	0.46809	0.9998	0.922509	1.0506	0.802504	2.13634	2.757	0.901152	1.52943	1.9038	Y	3			___1	1	0.00362934	68.536	24.096	68.536	-3.8393	19555000	5405000	8881500	5268900	95	Q925I1	95	Q925I1	Q925I1	ATPase family AAA domain-containing protein 3	Atad3	QEQTLQLEQQSKLKEYEAAVEQLKSEQIRVQ
0.99028	1.7452	1.7975	0.7753	1.1325	1.5036	NaN	NaN	NaN	NaN	NaN	NaN	NaN	NaN	NaN	NaN	NaN	NaN	NaN	NaN	NaN	NaN	NaN	NaN	0.88279	1.43885	1.65055	Y	2			___1	0.999995	8.61832e-05	119.25	84.136	119.25	0.062976	2630400	841000	735790	1053600	98	O88398	98	O88398	O88398	Advillin	Avil	DDYLGGSPVQHREVQYHESDTFRGYFKQGII
2.3176	1.9539	0.85465	2.0025	1.3688	0.66105	NaN	NaN	NaN	NaN	NaN	NaN	NaN	NaN	NaN	NaN	NaN	NaN	NaN	NaN	NaN	NaN	NaN	NaN	2.16005	1.66135	0.75785	Y	4			___1	0.999941	0.000310397	83.251	57.327	81.48	-0.05397	2544500	466110	1463200	615110	178	Q6PAJ1	178	Q6PAJ1	Q6PAJ1	Breakpoint cluster region protein	Bcr	KGPAQPGSADAEKPFYVNVEFHHERGLVKVN
1.7138	2.1659	1.2285	1.5727	2.0187	1.2425	1.6963	2.0037	1.4447	3.3018	3.6322	1.077	NaN	NaN	NaN	NaN	NaN	NaN	NaN	NaN	NaN	NaN	NaN	NaN	2.07115	2.45512	1.24817	Y	3			___1	0.972043	4.04943e-07	101.9	56.814	92.439	-0.22653	25728000	5042900	10992000	9693100	225	P35991	225	P35991	P35991	Tyrosine-protein kinase BTK	Btk	PISTTELKKVVALYDYMPMNANDLQLRKGEE
1.362	2.0516	1.3418	1.4288	1.868	1.2254	1.8143	2.0039	1.1899	1.9717	2.1519	1.1709	NaN	NaN	NaN	NaN	NaN	NaN	NaN	NaN	NaN	NaN	NaN	NaN	1.6442	2.01885	1.232	Y	2			___1	0.999529	1.62515e-17	144.3	104.64	129.51	-0.040763	33349000	6245800	13322000	13781000	223	P35991	223	P35991	P35991	Tyrosine-protein kinase BTK	Btk	AAPISTTELKKVVALYDYMPMNANDLQLRKG
1.3765	1.3293	1.1609	1.3918	1.6405	1.1189	1.7549	1.6813	1.0381	1.8615	2.0503	1.1556	1.0825	0.77142	0.58058	1.1808	1.2624	0.66293	1.29631	1.72242	1.0825	0.792142	1.50845	1.1808	1.41219	1.65538	1.1228	Y	3			___1	0.980453	1.06467e-06	103.6	66.395	103.6	0.011889	36478000	9107900	14989000	12381000	344	P35991	344	P35991	P35991	Tyrosine-protein kinase BTK	Btk	GVIRHYVVCSTPQSQYYLAEKHLFSTIPELI
0.78173	0.94225	0.91943	0.9241	0.88445	0.83118	0.41367	0.75182	0.86902	0.5156	0.55639	1.0897	NaN	NaN	NaN	NaN	NaN	NaN	NaN	NaN	NaN	NaN	NaN	NaN	0.658775	0.783728	0.927333	Y	2			___1	0.962486	3.15788e-23	175.6	133.9	174.95	0.0065766	5648400	2179500	1875400	1593600	551	P35991	551	P35991	P35991	Tyrosine-protein kinase BTK	Btk	KVSDFGLSRYVLDDEYTSSVGSKFPVRWSPP
NaN	NaN	NaN	NaN	NaN	NaN	NaN	NaN	NaN	NaN	NaN	NaN	0.9608	0.79268	0.87368	0.95792	0.80314	0.77489	1.26154	1.14458	0.9608	1.24511	1.29051	0.95792	1.25333	1.21754	0.95936	Y	2			___2	0.99838	0.00681796	71.614	27.002	71.614	-0.68079	9033100	3356700	3133800	2542600	463	O55017	463	O55017	O55017	Voltage-dependent N-type calcium channel subunit alpha-1B	Cacna1b	FARASLKSGKTESSSYFRRKEKMFRFFIRRM
1.9271	1.2991	0.67989	NaN	NaN	NaN	3.301	1.9943	0.8245	2.2918	2.0636	0.89027	1.9401	0.56073	0.27573	1.7636	0.55576	0.30884	1.78339	3.62674	1.9401	1.79934	3.23792	1.7636	2.22053	2.44433	1.21967	Y	3			___1	0.99905	1.20062e-07	119.51	62.687	110.74	-0.045449	14410000	3886600	8792800	1730200	31	P40124	31	P40124	P40124	Adenylyl cyclase-associated protein 1	Cap1	GRLEAVSHTSDMHCGYGDSPSKGAVPYVQAF
1.0886	1.1548	1.07	0.89169	1.0375	1.0665	1.0398	1.0385	1.1069	0.78832	1.0059	1.1336	0.94673	0.84418	0.88956	0.9915	0.89873	0.91202	1.18458	1.12415	0.94673	1.11268	1.09647	0.9915	1.01761	1.07622	1.05254	Y	2			___1	0.998653	1.67426e-05	107.32	64.403	107.32	0.351	24525000	8504300	8556900	7463700	353	P40124	353	P40124	P40124	Adenylyl cyclase-associated protein 1	Cap1	NLVIDDTELKQVAYIYKCVNTTLQIKGKINS
0.81995	0.8806	1.0227	0.83007	0.91595	1.0303	1.0745	1.1272	1.0432	1.0098	1.0231	1.0827	NaN	NaN	NaN	NaN	NaN	NaN	NaN	NaN	NaN	NaN	NaN	NaN	0.93358	0.986713	1.04473	Y	3			___1	0.989002	2.52507e-16	127.35	96.482	82.362	-0.038567	19525000	6363600	7077300	6083800	81	Q9CZ42	81	Q9CZ42	Q9CZ42	ATP-dependent (S)-NAD(P)H-hydrate dehydratase	Carkd	KGQDGRIGIVGGCQEYTGAPYFAGISALKVG
0.9121	1.374	1.5138	0.81165	1.1586	1.3058	1.1644	1.39	1.0331	1.1088	1.3141	1.1302	NaN	NaN	NaN	NaN	NaN	NaN	NaN	NaN	NaN	NaN	NaN	NaN	0.999237	1.30917	1.24572	Y	2			___1	1	2.79425e-14	169.09	117.63	128.21	-0.30395	3434100	940680	1124700	1368700	231	P24270	231	P24270	P24270	Catalase	Cat	GSHTFKLVNADGEAVYCKFHYKTDQGIKNLP
NaN	NaN	NaN	NaN	NaN	NaN	1.5956	1.8313	1.1825	1.1391	1.5607	1.1801	NaN	NaN	NaN	NaN	NaN	NaN	NaN	NaN	NaN	NaN	NaN	NaN	1.36735	1.696	1.1813	Y	3			___1	0.999946	1.38927e-32	155.16	118.43	149.18	0.40056	3754900	725110	1354900	1674900	319	Q8K4F0	319	Q8K4F0	Q8K4F0	CD226 antigen	Cd226	PTSPIQSTDDEKEDIYVNYPTFSRRPKPRL_
1.2569	1.5099	1.1948	1.3528	1.365	1.176	1.4746	1.6831	1.1175	1.8907	1.8534	0.96439	1.4207	1.0383	0.8016	2.0496	1.9386	0.92274	0.963113	1.24751	1.4207	0.515836	1.08373	2.0496	1.24232	1.45711	1.3205	Y	2			___1	0.989746	2.28682e-05	128.57	81.769	128.57	0.35268	12908000	4424900	4834500	3648800	344	Q07763	344	Q07763	Q07763	Natural killer cell receptor 2B4	Cd244	QCKPSDSTSQEKCTVYSVVQPSRKSGSKKRN
1.1309	NaN	NaN	0.82736	0.90352	1.1537	NaN	NaN	NaN	NaN	NaN	NaN	1.0508	0.86155	0.76628	1.4429	1.0205	0.6999	1.1607	1.30501	1.0508	0.979912	1.42878	1.4429	0.989324	1.21243	1.2158	Y	2			___1	0.988876	0.000553006	116.55	84.949	89.9	0.014066	27564000	10036000	9917600	7610200	303	Q6SJQ0	303	Q6SJQ0	Q6SJQ0	CMRF35-like molecule 8	Cd300a	ANGDSLHQPQDQKAEYSEIQKPRKGLSDLYL
NaN	NaN	NaN	0.85519	0.97021	1.1389	0.72098	0.75681	1.0258	0.71506	0.74932	1.0974	1.4244	1.3026	0.89456	1.3614	1.2543	0.93797	0.767695	1.11787	1.4244	0.797257	1.06613	1.3614	0.771237	0.932068	1.20958	Y	3			___1	0.968263	8.84856e-05	84.195	49.062	74.783	-0.099464	40157000	12965000	15304000	11888000	280	Q18PI6	280	Q18PI6	Q18PI6	SLAM family member 5	Cd84	YAVVSRNAQPTESRIYDEIPQSKMLSCKEDP
0.82449	0.84457	0.96704	0.79745	0.80292	0.91854	1.3413	1.2728	1.1265	NaN	NaN	NaN	NaN	NaN	NaN	NaN	NaN	NaN	NaN	NaN	NaN	NaN	NaN	NaN	0.987747	0.97343	1.00403	Y	3			___1	0.982228	9.13241e-05	93.181	69.128	85.909	0.17031	13375000	4955600	4619400	3800300	620	O89103	620	O89103	O89103	Complement component C1q receptor	Cd93	KEEIKEKKPQNAADSYSWVPERAESQAPENQ
0.94527	1.3697	1.332	0.93699	1.2047	1.2092	0.87156	0.92247	0.99575	0.90509	0.92394	0.98018	1.0977	0.88642	0.92187	NaN	NaN	NaN	1.12813	1.08475	1.0977	NaN	NaN	NaN	0.957409	1.10111	1.12297	Y	2			___1	0.999995	2.68676e-05	131.12	51.241	131.12	-0.09784	31409000	10155000	11480000	9773500	19	P11440;Q80YP0;P97377	19;19;19	P11440	P11440	Cyclin-dependent kinase 1;Cyclin-dependent kinase 3;Cyclin-dependent kinase 2	Cdk1;Cdk3;Cdk2	YIKIEKIGEGTYGVVYKGRHRVTGQIVAMKK
0.86944	0.91281	1.0574	0.78162	0.84991	1.0291	0.92348	1.0343	1.0867	0.99446	1.0408	1.0857	1.014	0.93096	0.85201	1.0144	0.98657	0.96599	1.07416	1.1737	1.014	1.01361	1.03521	1.0144	0.942795	1.00779	1.04788	Y	2			___2	1	1.55537e-09	159.09	76.005	111.83	0.13195	1066000000	350560000	386800000	328610000	15	P11440;Q80YP0;P97377	15;15;15	P11440	P11440	Cyclin-dependent kinase 1;Cyclin-dependent kinase 3;Cyclin-dependent kinase 2	Cdk1;Cdk3;Cdk2	_MEDYIKIEKIGEGTYGVVYKGRHRVTGQIV
0.94543	1.0652	1.107	0.99737	1.042	1.1207	1.0045	0.91876	0.93772	0.88269	0.85544	0.9739	1.0406	0.90183	0.8305	1.0415	0.89436	0.84618	1.10886	1.20409	1.0406	1.11812	1.18178	1.0415	1.00949	1.04455	1.0369	Y	2			___1	1	1.55537e-09	159.09	76.005	111.83	0.13195	1066000000	350560000	386800000	328610000	15	P11440;Q80YP0;P97377	15;15;15	P11440	P11440	Cyclin-dependent kinase 1;Cyclin-dependent kinase 3;Cyclin-dependent kinase 2	Cdk1;Cdk3;Cdk2	_MEDYIKIEKIGEGTYGVVYKGRHRVTGQIV
NaN	NaN	NaN	NaN	NaN	NaN	0.83379	0.71314	0.83367	NaN	NaN	NaN	0.99591	1.3203	1.2878	0.91667	1.3254	1.2997	0.757404	0.776518	0.99591	0.754489	0.769408	0.91667	0.781894	0.753022	0.915417	Y	2			___1	0.842266	0.0041825	69.331	41.597	69.331	-4.0757	19683000	5594500	6184300	7904000	424	E9Q2Z1	424	E9Q2Z1	E9Q2Z1		Cecr2	KTKDLFELDDDFTAMYKVLDVVKAHKDSWPF
1.0767	1.5536	1.2874	1.024	1.3271	1.1039	1.9407	1.6633	1.1178	1.4308	2.049	1.438	1.0648	0.77864	0.74319	0.97166	0.80527	0.76437	1.28429	1.34555	1.0648	1.24182	1.30827	0.97166	1.33305	1.54114	1.16393	Y	3			___1	1	2.51906e-28	188.09	141.68	101.3	-0.91796	21535000	6270400	7967300	7297300	140	P18760	140	P18760	P18760	Cofilin-1	Cfl1	KKKLTGIKHELQANCYEEVKDRCTLAEKLGG
NaN	NaN	NaN	5.1841	2.2047	0.41104	NaN	NaN	NaN	NaN	NaN	NaN	1.1931	0.096253	0.076594	1.1683	0.13858	0.11341	10.3893	13.0559	1.1931	7.21605	8.81756	1.1683	7.59648	8.02604	0.924147	Y	3			___1	1	0.000471536	107.65	59.654	96.866	-0.063639	19506000	7472400	10794000	1239900	75	Q80XD1	75	Q80XD1	Q80XD1	Beta-chimaerin	Chn2	LVRRAALTHNDNHFNYEKTHNFKVHTFRGPH
NaN	NaN	NaN	NaN	NaN	NaN	0.85138	0.81197	0.8311	0.84575	0.89848	1.0423	NaN	NaN	NaN	NaN	NaN	NaN	NaN	NaN	NaN	NaN	NaN	NaN	0.848565	0.855225	0.9367	Y	2			___1	1	0.00226576	72.607	31.991	72.607	0.60855	2040000	771160	630990	637890	46	Q9DA19	46	Q9DA19	Q9DA19	Corepressor interacting with RBPJ 1	Cir1	KISYDKKKQEELMQQYLKEQESYDNRLLMGD
1.0068	0.80141	0.84775	0.88727	0.8147	0.86235	0.91023	0.90142	1.108	1.0559	1.1694	1.0321	NaN	NaN	NaN	NaN	NaN	NaN	NaN	NaN	NaN	NaN	NaN	NaN	0.96505	0.921733	0.96255	Y	2			___1	1	1.65987e-58	214.82	166.6	169.06	0.34797	13428000	4564200	5197900	3666300	69	Q9QZE2	69	Q9QZE2	Q9QZE2	Cytokine-dependent hematopoietic cell linker	Clnk	LAGVPGGEKCNSNNDYEDPEFQLLKAWPSMK
0.97095	1.6397	1.7215	0.7961	2.0528	2.4786	1.5173	1.5032	1.1359	1.2744	1.0944	0.84308	1.0991	0.9863	0.86764	1.14	1.1108	0.88336	1.01389	1.15255	1.0991	0.900252	1.13204	1.14	1.07882	1.42912	1.40303	Y	3			___1	0.999996	6.69028e-11	151.55	85.243	100.02	0.0043129	31613000	9732500	10319000	11561000	634	Q68FD5	634	Q68FD5	Q68FD5	Clathrin heavy chain 1	Cltc	KAGLLQRALEHFTDLYDIKRAVVHTHLLNPE
0.90138	1.0487	1.1181	0.95646	0.91311	0.96883	0.97373	1.0226	1.2131	1.0019	1.0997	0.98914	NaN	NaN	NaN	NaN	NaN	NaN	NaN	NaN	NaN	NaN	NaN	NaN	0.958367	1.02103	1.07229	Y	3			___1	0.999995	1.48086e-49	194.19	150.8	194.19	0.12204	19121000	5799100	7523600	5798400	301	Q9WUM4	301	Q9WUM4	Q9WUM4	Coronin-1C	Coro1c	GDSSIRYFEITDESPYVHYLNTFSSKEPQRG
0.61986	0.70176	1.2181	0.75794	0.61198	0.85576	NaN	NaN	NaN	NaN	NaN	NaN	NaN	NaN	NaN	NaN	NaN	NaN	NaN	NaN	NaN	NaN	NaN	NaN	0.6889	0.65687	1.03693	Y	2			___1	0.999998	6.9813e-06	130.56	90.832	130.56	0.004174	3256900	1508800	962340	785800	348	P15089	348	P15089	P15089	Mast cell carboxypeptidase A	Cpa3	IATDALSTRYETRYIYGPIASTIYKTSGSSL
0.80284	0.71415	0.84295	0.87173	0.85651	0.97419	1.0111	1.3617	1.2873	NaN	NaN	NaN	NaN	NaN	NaN	NaN	NaN	NaN	NaN	NaN	NaN	NaN	NaN	NaN	0.895223	0.977453	1.03481	Y	2			___1	1	1.99635e-07	124.81	79.531	124.81	-0.11899	5802100	1976400	2285100	1540700	155	P15089	155	P15089	P15089	Mast cell carboxypeptidase A	Cpa3	VSRIKIGSTVEDNPLYVLKIGKKDGERKAIF
NaN	NaN	NaN	NaN	NaN	NaN	NaN	NaN	NaN	NaN	NaN	NaN	2.013	0.20871	0.099464	2.3818	0.26654	0.10767	4.79134	10.0539	2.013	3.75178	9.28764	2.3818	4.27156	9.67077	2.1974	Y	2			___1	1	0.00495086	76.221	43.223	65.224	0.12752	12041000	3300600	7855700	884240	251	P47941	251	P47941	P47941	Crk-like protein	Crkl	GPVFAKAIQKRVPCAYDKTALALEVGDIVKV
1.6697	2.6417	1.6067	2.3757	2.7607	1.1233	3.5037	3.1656	1.1566	2.0252	2.2204	1.0887	NaN	NaN	NaN	NaN	NaN	NaN	NaN	NaN	NaN	NaN	NaN	NaN	2.39357	2.6971	1.24382	Y	2			___1	0.999912	2.57751e-46	200.69	154.37	168.42	-0.36096	7774100	1275300	3318300	3180500	132	P47941	132	P47941	P47941	Crk-like protein	Crkl	NLPTAEENLEYVRTLYDFPGNDAEDLPFKKG
0.6788	0.94532	1.1078	0.72549	0.90039	1.2787	NaN	NaN	NaN	NaN	NaN	NaN	NaN	NaN	NaN	NaN	NaN	NaN	NaN	NaN	NaN	NaN	NaN	NaN	0.702145	0.922855	1.19325	Y	3			___1	1	6.06135e-05	93.478	71.802	93.478	0.017366	7063900	2581700	2396500	2085800	861	P26955	861	P26955	P26955	Cytokine receptor common subunit beta	Csf2rb	ETEDLVQDLSVKKFPYQPMPQAPAIQFFKSL
0.59961	0.85988	1.0551	0.67318	1.056	1.5374	0.85932	1.1625	1.1634	0.78652	1.1784	1.2205	1.087	1.0994	0.99806	1.0019	1.0115	0.95049	0.909587	1.00194	1.087	0.988631	1.05209	1.0019	0.802808	1.0518	1.17755	Y	2			___1	1	1.04555e-09	111.64	81.837	111.64	-0.051677	356360000	125320000	131880000	99166000	861	P26954	861	P26954	P26954	Interleukin-3 receptor class 2 subunit beta	Csf2rb2	ETEDLDQDLSVKKFPYQPLPQAPAIQFFKSL
1.119	1.332	1.1923	0.92535	1.1296	1.1467	1.9921	2.0875	1.1883	NaN	NaN	NaN	NaN	NaN	NaN	NaN	NaN	NaN	NaN	NaN	NaN	NaN	NaN	NaN	1.34548	1.51637	1.17577	Y	2			___1	1	0.000378854	85.536	47.235	71.031	0.42843	10034000	3059100	3960400	3014500	108	Q5SQX6;Q7TMB8	108;108	Q5SQX6;Q7TMB8	Q7TMB8	Cytoplasmic FMR1-interacting protein 2;Cytoplasmic FMR1-interacting protein 1	Cyfip2;Cyfip1	IPQVKCNEQPNRVEIYEKTVEVLEPEVTKLM
7.5626	8.0439	1.0288	4.7774	4.4867	0.95134	3.2995	3.1605	1.0912	3.4862	3.2836	1.0665	1.8024	0.1902	0.10506	1.3528	0.28117	0.20173	5.25762	9.51837	1.8024	3.55657	4.95712	1.3528	4.65665	5.57503	1.21551	Y	2			___1	0.999994	1.06117e-39	213.63	171.81	212.9	-0.16856	240300000	59895000	132770000	47630000	139	Q9QXT1	139	Q9QXT1	Q9QXT1	Dual adapter for phosphotyrosine and 3-phosphotyrosine and 3-phosphoinositide	Dapp1	VLKHPYPREVEEPCIYESVRVHTAMQTGRTE
1.1543	1.3687	1.0933	0.83073	1.3887	1.6167	0.99739	1.2884	1.1038	1.1963	1.4795	1.2311	1.2351	1.246	1.0354	NaN	NaN	NaN	0.802568	0.96581	1.2351	NaN	NaN	NaN	0.996258	1.29822	1.256	Y	3			___1	0.918877	7.57033e-12	137.39	103.5	124.2	-0.11086	43802000	10862000	19068000	13871000	29	P31786	29	P31786	P31786	Acyl-CoA-binding protein	Dbi	KRLKTQPTDEEMLFIYSHFKQATVGDVNTDR
NaN	NaN	NaN	0.88846	1.1202	1.3113	NaN	NaN	NaN	NaN	NaN	NaN	0.96053	0.94487	0.85879	1.0724	0.91416	0.83178	1.05835	1.16443	0.96053	1.0939	1.20224	1.0724	1.01357	1.16229	1.11474	Y	2			___1	1	1.02987e-05	128.35	94.142	128.35	-0.18254	6460100	2036600	2385400	2038100	200	Q501J6;Q61656	200;202	Q501J6;Q61656	Q501J6	Probable ATP-dependent RNA helicase DDX17;Probable ATP-dependent RNA helicase DDX5	Ddx17;Ddx5	AAEYCRACRLKSTCIYGGAPKGPQIRDLERG;ADDYGKCSRLKSTCIYGGAPKGPQIRDLERG
0.6409	0.50764	0.74256	0.74222	0.41992	0.57583	0.56226	0.40806	0.68702	0.57057	0.44831	0.7957	1.9303	0.50945	0.25676	1.8448	0.54342	0.29268	1.9629	3.89469	1.9303	1.8402	3.4167	1.8448	1.05317	1.51589	1.09604	Y	3			___1	1	1.75353e-61	202.61	172.05	162.32	0.12634	66809000	21559000	34655000	10596000	361	P97465	361	P97465	P97465	Docking protein 1	Dok1	QLLKTKLTDSKEDPIYDEPEGLAPAPPRGLY
2.0586	2.4987	1.228	1.8153	2.4639	1.3128	2.1299	3.0359	1.1857	2.1746	2.0714	1.3055	1.5953	0.67912	0.40424	1.5646	0.71043	0.43467	1.47249	2.47378	1.5953	1.4076	2.3006	1.5646	1.84308	2.47405	1.36532	Y	3			___1	0.999986	2.11046e-17	180.06	126.19	104.55	-0.30063	13755000	2927900	6576600	4250500	1008	Q9JHU4	1008	Q9JHU4	Q9JHU4	Cytoplasmic dynein 1 heavy chain 1	Dync1h1	SLPRIQSQRYQVGVHYELTEEEKFYRNALTR
0.95025	0.9298	1.0364	0.91565	0.93114	1.0557	1.0285	0.87295	1.0058	1.0653	0.94921	1.0184	0.9284	0.90242	0.91295	0.92876	0.88644	0.93484	1.10813	1.09535	0.9284	1.12811	1.0697	0.92876	1.03266	0.974692	0.995577	Y	2			___1	1	1.75565e-13	172.94	130.71	168.27	0.13248	1982000000	657720000	688880000	635440000	273	Q9Z188;Q61214	273;321	Q9Z188	Q9Z188	Dual specificity tyrosine-phosphorylation-regulated kinase 1B;Dual specificity tyrosine-phosphorylation-regulated kinase 1A	Dyrk1b;Dyrk1a	VDFGSSCQLGQRIYQYIQSRFYRSPEVLLGT
0.99727	0.97546	1.1014	0.9312	0.97518	1.0652	1.521	1.6044	0.96508	1.3371	1.2651	0.85388	NaN	NaN	NaN	NaN	NaN	NaN	NaN	NaN	NaN	NaN	NaN	NaN	1.19664	1.20503	0.99639	Y	2			___1	0.939845	0.000143868	105.1	78.659	105.1	0.12792	8282800	2903100	2933700	2445900	380	Q5U4C9;Q8BI55	380;379	Q5U4C9	Q5U4C9	Dual specificity tyrosine-phosphorylation-regulated kinase 2;Dual specificity tyrosine-phosphorylation-regulated kinase 4	Dyrk2;Dyrk4	IDFGSSCYEHQRVYTYIQSRFYRAPEVILGA
NaN	NaN	NaN	NaN	NaN	NaN	0.52242	0.74852	0.97336	0.5155	0.65376	0.98292	1.1956	0.87024	0.72787	1.1525	1.0374	0.89339	1.14911	1.37387	1.1956	0.963948	1.11933	1.1525	0.787744	0.973871	1.0761	Y	3			___2	1	0.00741735	67.519	7.4389	49.632	1.8294	102960000	34341000	39833000	28788000	333	Q61614	333	Q61614	Q61614	Endothelin-1 receptor	Ednra	CWFPLHLSRILKKTVYDEMDKNRCELLSFLL
NaN	NaN	NaN	NaN	NaN	NaN	NaN	NaN	NaN	NaN	NaN	NaN	1.0277	1.0285	0.93686	0.76565	1.0254	1.2266	0.97229	1.0674	1.0277	0.975229	0.815262	0.76565	0.973759	0.941328	0.896675	Y	2			___1	0.881031	0.000477314	95.502	50.479	95.502	0.081492	3771200	1511700	1212600	1046900	177	P10126	177	P10126	P10126	Elongation factor 1-alpha 1	Eef1a1	YSQKRYEEIVKEVSTYIKKIGYNPDTVAFVP
0.8913	1.0595	1.2076	0.86063	1.0495	1.1589	0.99269	1.0266	0.94282	1.0672	0.98636	0.89553	1.2297	1.1431	0.93418	1.0297	0.95074	0.88924	0.874814	1.07046	1.2297	1.05181	1.12456	1.0297	0.956408	1.05283	1.07737	Y	2			___1	0.999413	2.58169e-28	187.78	129.15	187.78	-0.052128	136240000	46658000	48387000	41196000	141	P10126;P62631	141;141	P10126;P62631	P10126	Elongation factor 1-alpha 1;Elongation factor 1-alpha 2	Eef1a1;Eef1a2	GISKNGQTREHALLAYTLGVKQLIVGVNKMD
0.89945	1.0252	1.1337	0.9252	1.0597	1.1549	0.97781	1.0045	0.93315	1.0583	0.98084	0.9381	0.92229	1.0086	1.0585	0.97081	0.8765	0.9209	0.991473	0.944733	0.92229	1.1409	1.08589	0.97081	0.998856	1.01681	1.00882	Y	2			___1	1	3.03947e-19	185.33	131.58	178.84	0.037938	97941000	33781000	33872000	30288000	29	P10126;P62631	29;29	P10126;P62631	P10126	Elongation factor 1-alpha 1;Elongation factor 1-alpha 2	Eef1a1;Eef1a2	GHVDSGKSTTTGHLIYKCGGIDKRTIEKFEK
1.0777	1.2299	1.131	1.0776	1.1818	1.067	1.1418	1.2916	1.0784	1.0455	1.1807	1.1429	1.1396	1.0856	0.94176	1.1636	1.2263	0.79295	0.92115	1.06184	1.1396	0.815461	1.26111	1.1636	1.0132	1.20116	1.12042	Y	3			___1	0.996056	7.91315e-16	123.59	106.99	123.59	-0.084097	161740000	52157000	60552000	49034000	44	P17182	44	P17182	P17182	Alpha-enolase	Eno1	GLFRAAVPSGASTGIYEALELRDNDKTRFMG
0.96476	1.1556	1.0208	NaN	NaN	NaN	1.0891	0.92533	0.94633	1.0814	0.97566	0.96861	NaN	NaN	NaN	NaN	NaN	NaN	NaN	NaN	NaN	NaN	NaN	NaN	1.04509	1.01886	0.97858	Y	2			___1	0.900463	2.90339e-16	168.93	135.39	160.87	-0.39553	6697500	2010200	2436200	2251100	25	P17182;P17183	25;25	P17182	P17182	Alpha-enolase;Gamma-enolase	Eno1;Eno2	EIFDSRGNPTVEVDLYTAKGLFRAAVPSGAS
1.1054	0.82802	0.74144	0.74751	1.0182	1.1909	NaN	NaN	NaN	NaN	NaN	NaN	1.0503	1.1287	1.0377	1.0549	1.2212	1.0336	0.885975	0.96367	1.0503	0.818867	0.967492	1.0549	0.889438	0.944345	1.00938	Y	3			___1	0.950455	1.2964e-18	145.43	93.407	145.43	-0.2339	21465000	7314000	7556600	6594600	809	Q3U7R1	809	Q3U7R1	Q3U7R1	Extended synaptotagmin-1	Esyt1	AEDLPLRKGTKPPSPYATITVGETSHKTKTV
0.73276	1.0217	1.3689	0.77428	1.033	1.3029	1.0223	0.90122	0.92422	1.1416	1.0438	1.0176	1.0589	0.92558	0.98632	0.9091	0.93298	0.96704	1.0804	1.01387	1.0589	1.07183	1.03408	0.9091	0.97053	1.00795	1.09694	Y	2			___1	1	6.95558e-05	98.105	67.899	74.392	0.18508	72612000	23271000	26418000	22923000	270	P26040;P26041;P26043	270;270;270	P26040;P26041;P26043	P26041	Ezrin;Moesin;Radixin	Ezr;Msn;Rdx	FVIKPIDKKAPDFVFYAPRLRINKRILALCM;FVIKPIDKKAPDFVFYAPRLRINKRILQLCM
0.76349	1.0085	1.2806	0.74215	0.97577	1.2264	0.81606	0.94873	1.0651	0.92414	1.059	1.1456	1.0758	1.2353	1.1284	1.0339	1.145	1.1084	0.80952	0.886211	1.0758	0.873362	0.902201	1.0339	0.821454	0.963402	1.1379	Y	2			___1	0.999999	4.28937e-97	263.72	218.99	263.72	-0.24216	470730000	153920000	158450000	158360000	425	P30558	425	P30558	P30558	Proteinase-activated receptor 1	F2r	PSKMDTCSSHLNNSIYKKLLA__________
2.5316	3.6262	1.5064	2.7063	4.4455	1.6395	2.026	3.3266	1.8224	1.9568	3.64	1.7508	2.6941	0.25435	0.093339	2.5983	0.24941	0.099435	3.93159	10.7136	2.6941	4.00946	10.0568	2.5983	2.86029	5.96813	2.00192	Y	3			___1	0.99998	2.02851e-49	219.92	154.42	123.28	0.053581	1393200000	318930000	835210000	239070000	65	P20491	65	P20491	P20491	High affinity immunoglobulin epsilon receptor subunit gamma	Fcer1g	VRKAAIASREKADAVYTGLNTRSQETYETLK
1.2421	2.0165	1.2307	1.1744	1.8547	1.6971	3.3289	6.1163	1.7498	3.4565	6.4115	1.7937	2.3305	0.45703	0.19782	2.43	0.65273	0.20383	2.18804	5.0551	2.3305	1.53203	4.90605	2.43	2.15366	4.39336	1.87197	Y	2			___1	0.999957	1.12114e-59	231.42	151.93	202.96	0.15555	472660000	119280000	276850000	76527000	76	P20491	76	P20491	P20491	High affinity immunoglobulin epsilon receptor subunit gamma	Fcer1g	ADAVYTGLNTRSQETYETLKHEKPPQ_____
1.5932	7.6192	4.5996	1.5574	7.3255	4.6792	1.8088	4.7992	2.6573	1.7742	3.145	2.134	2.6156	0.53212	0.1936	3.2579	0.71578	0.20574	1.87928	5.16529	2.6156	1.39708	4.8605	3.2579	1.66833	5.48578	3.32393	Y	3			___1	0.999522	3.24009e-06	121.99	90.21	121.99	-0.4501	20422000	3953500	8653400	7814800	326	P08101	326	P08101	P08101	Low affinity immunoglobulin gamma Fc region receptor II	Fcgr2	LLKHPEALDEETEHDYQNHI___________
NaN	NaN	NaN	0.569	0.41908	0.71475	0.70442	0.4	0.51354	0.81416	0.39768	0.47951	1.2228	0.34986	0.26686	1.1991	0.28437	0.23461	2.85829	3.74728	1.2228	3.51655	4.26239	1.1991	1.69248	1.84529	0.82594	Y	2			___1	0.990704	2.53206e-31	196.67	117.74	190.24	-0.21781	15469000	6549500	6829000	2090400	715	P70451	715	P70451	P70451	Tyrosine-protein kinase Fer	Fer	KISDFGMSRQEDGGVYSSSGLKQIPIKWTAP
1.24	0.99587	0.86705	1.2598	1.034	0.90363	1.8169	1.9754	1.4493	1.639	2.0592	1.1173	NaN	NaN	NaN	NaN	NaN	NaN	NaN	NaN	NaN	NaN	NaN	NaN	1.48892	1.51612	1.08432	Y	3			___1	1	0.000103051	152.06	106.85	152.06	-0.2595	7600000	2304700	3056800	2238500	372	Q8K1B8	372	Q8K1B8	Q8K1B8	Fermitin family homolog 3	Fermt3	RIFRPRKLTLKGYRQYWVVFKDTTLSYYKSQ
1.0316	1.2882	1.2721	0.76529	1.0434	1.33	1.6434	1.8873	1.3159	NaN	NaN	NaN	NaN	NaN	NaN	NaN	NaN	NaN	NaN	NaN	NaN	NaN	NaN	NaN	1.14676	1.4063	1.306	Y	4			___1	0.998122	5.21562e-05	81.477	67.326	71.143	0.15609	7323600	2440800	2673100	2209600	456	P16879	456	P16879	P16879	Tyrosine-protein kinase Fes/Fps	Fes	IPPPLQLVPEVQKPLYEQLWYHGAIPRAEVA
1.2383	1.8962	1.1524	0.79512	0.79711	1.2971	2.121	2.1075	0.9751	NaN	NaN	NaN	NaN	NaN	NaN	NaN	NaN	NaN	NaN	NaN	NaN	NaN	NaN	NaN	1.38481	1.60027	1.14153	Y	2			___1	0.973558	7.58615e-16	159.41	109.82	159.41	0.098865	9310300	2916200	3321800	3072200	904	Q80X90	904	Q80X90	Q80X90	Filamin-B	Flnb	PGEAVKDLDIIDNYDYSHTVKYTPTQQGNMQ
0.50673	0.2193	0.41815	0.46434	0.20069	0.38824	0.21366	0.11165	0.44454	0.22067	0.10481	0.46842	0.9881	0.28415	0.27697	NaN	NaN	NaN	3.51927	3.6105	0.9881	NaN	NaN	NaN	0.984933	0.84939	0.54149	Y	2			___1	0.999994	1.35836e-63	234.79	194.64	234.79	0.10122	133000000	69989000	47178000	15838000	559	O35601	559	O35601	O35601	FYN-binding protein	Fyb	RGSYGYIKTTAVEIDYDSLKRKKNSLNAVPP
0.85652	0.90884	1.0653	NaN	NaN	NaN	0.8809	0.97725	1.081	0.93337	0.93951	1.0911	0.97034	0.95777	0.96277	0.95686	0.93587	0.94774	1.04409	1.03867	0.97034	1.06852	1.05514	0.95686	0.956681	0.983882	1.03292	Y	2			___1	0.986703	5.54626e-05	131.83	85.757	99.539	0.22898	47269000	15126000	17179000	14964000	401	Q00612	401	Q00612	Q00612	Glucose-6-phosphate 1-dehydrogenase X	G6pdx	KRNELVIRVQPNEAVYTKMMTKKPGMFFNPE
1.1589	1.0808	0.9391	0.93595	0.91149	0.96699	1.5053	1.572	1.0812	1.1615	1.3437	1.1801	1.0017	0.98504	0.97423	0.95871	0.88595	0.96625	1.01519	1.02645	1.0017	1.12873	1.03493	0.95871	1.15093	1.16156	1.0213	Y	2			___1	0.999921	4.45994e-06	139.76	88.294	139.76	-0.17955	27789000	9625200	9955100	8209100	503	Q00612	503	Q00612	Q00612	Glucose-6-phosphate 1-dehydrogenase X	G6pdx	GPTEADELMKRVGFQYEGTYKWVNPHKL___
0.96103	1.0344	1.0884	0.99701	1.0211	1.0427	1.3787	1.2898	0.9701	1.3544	0.83966	0.83976	NaN	NaN	NaN	NaN	NaN	NaN	NaN	NaN	NaN	NaN	NaN	NaN	1.17279	1.04624	0.98524	Y	2			___1	0.997054	6.95284e-24	184.76	136.24	159.41	0.38512	9987700	3192900	3893900	2900900	316	P16858	316	P16858	P16858	Glyceraldehyde-3-phosphate dehydrogenase	Gapdh	LNDNFVKLISWYDNEYGYSNRVVDLMAYMAS
NaN	NaN	NaN	NaN	NaN	NaN	1.1241	1.0609	1.0133	1.132	0.94874	1.0138	1.6507	0.97564	0.5465	1.6079	0.87035	0.52044	1.02497	1.82983	1.6507	1.14896	1.92145	1.6079	1.10751	1.44023	1.32143	Y	3			___1	1	3.32982e-65	216.26	180.24	189.11	-0.069488	172680000	51281000	79157000	42239000	110	Q6RFH4	110	Q6RFH4	Q6RFH4	Germinal center-associated signaling and motility protein	Gcsam	EAVRGRPSVNPAEGFYENISNKAERHKESSR
1.5083	2.0124	1.3615	1.6149	2.0299	1.2194	1.8485	2.2207	1.0809	NaN	NaN	NaN	NaN	NaN	NaN	1.3236	0.68642	0.51562	NaN	NaN	NaN	1.45683	1.93941	1.3236	1.60713	2.0506	1.24635	Y	2			___1	0.999996	2.87282e-11	164.53	103.98	164.22	-0.46496	4088500	535280	2039900	1513300	1174	Q6Y7W8	1174	Q6Y7W8	Q6Y7W8	PERQ amino acid-rich with GYF domain-containing protein 2	Gigyf2	DVPTFVSFLKEVESPYEVHDYTRAYLGDTSE
1.1327	1.3518	1.0819	1.0789	1.1424	1.1486	NaN	NaN	NaN	1.3936	1.9284	1.3773	NaN	NaN	NaN	NaN	NaN	NaN	NaN	NaN	NaN	NaN	NaN	NaN	1.20173	1.4742	1.2026	Y	3			___1	0.960331	0.00125488	70.889	47.362	70.889	0.044737	6052300	1509700	2435200	2107400	61	P08752	61	P08752	P08752	Guanine nucleotide-binding protein G(i) subunit alpha-2	Gnai2	KSTIVKQMKIIHEDGYSEEECRQYRAVVYSN
0.83463	0.84575	1.0826	0.8325	0.91678	1.1467	1.1676	1.1979	1.116	0.8827	0.78752	1.0436	NaN	NaN	NaN	NaN	NaN	NaN	NaN	NaN	NaN	NaN	NaN	NaN	0.929358	0.936988	1.09723	Y	2			___1	1	0.000183487	113.62	86.141	113.62	0.51736	10607000	3395800	3433300	3778000	147	P11352	147	P11352	P11352	Glutathione peroxidase 1	Gpx1	PTPSDDPTALMTDPKYIIWSPVCRNDIAWNF
1.3161	1.3153	1.0018	1.233	1.3232	1.0532	NaN	NaN	NaN	NaN	NaN	NaN	1.3247	0.69524	0.48623	1.2568	0.61147	0.47306	1.43835	2.05664	1.3247	1.6354	2.1139	1.2568	1.40571	1.70226	1.15913	Y	2			___1	1	3.37911e-38	202.32	150.07	202.32	0.088522	19078000	5323000	8049600	5705800	45	O89100	45	O89100	O89100	GRB2-related adaptor protein 2	Grap2	NQEEWLKAELGSQEGYVPKNFIDIEFPEWFH
0.99427	1.0504	1.0526	0.92156	1.0223	1.1338	1.2368	1.0067	0.9547	1.239	1.0703	0.96689	0.75565	0.93754	1.1772	0.75317	0.92176	1.236	1.06662	0.849473	0.75565	1.08488	0.809062	0.75317	1.09052	0.968039	0.936135	Y	2			___1	0.999876	9.26582e-72	236.03	164.1	236.03	-0.087832	9046200000	2994200000	3073600000	2978300000	216	Q9WV60;Q2NL51	216;279	Q9WV60	Q9WV60	Glycogen synthase kinase-3 beta;Glycogen synthase kinase-3 alpha	Gsk3b;Gsk3a	FGSAKQLVRGEPNVSYICSRYYRAPELIFGA
NaN	NaN	NaN	NaN	NaN	NaN	NaN	NaN	NaN	NaN	NaN	NaN	1.1444	1.2469	1.0183	1.1733	1.2086	1.0511	0.801989	0.982029	1.1444	0.827404	0.951384	1.1733	0.814696	0.966707	1.15885	Y	2			___1	1	3.8978e-06	144.77	84.127	144.77	0.40694	7419100	2014000	2806500	2598600	339	P06339	339	P06339	P06339	H-2 class I histocompatibility antigen, D-37 alpha chain	H2-T23	AFVMKRRRHIGVKGCYAHVLGSKSFQTSDWP
1.1236	1.1209	1.0577	0.85861	1.1608	1.0809	1.1575	1.1355	1.034	1.162	1.2848	0.99896	NaN	NaN	NaN	NaN	NaN	NaN	NaN	NaN	NaN	NaN	NaN	NaN	1.07543	1.1755	1.04289	Y	2			___1	1	5.54924e-14	171.92	125.26	123.01	-0.27746	6831400	1999400	2582000	2250000	216	Q99LI8	216	Q99LI8	Q99LI8	Hepatocyte growth factor-regulated tyrosine kinase substrate	Hgs	PKFGIEKEVRVCEPCYEQLNKKAEGKASSTT
0.87976	0.91691	1.015	0.81316	0.76115	0.92203	NaN	NaN	NaN	NaN	NaN	NaN	NaN	NaN	NaN	NaN	NaN	NaN	NaN	NaN	NaN	NaN	NaN	NaN	0.84646	0.83903	0.968515	Y	2			___1	0.999992	2.95364e-23	185.2	117.99	185.2	0.1747	11329000	4132400	3900700	3296000	249	Q3UDW8	249	Q3UDW8	Q3UDW8	Heparan-alpha-glucosaminide N-acetyltransferase	Hgsnat	SELGSPSRADPLSADYQPETRRSSANRLRCV
0.8999	0.96927	1.116	0.84279	0.88125	1.1088	1.0043	0.91783	1.0132	NaN	NaN	NaN	NaN	NaN	NaN	NaN	NaN	NaN	NaN	NaN	NaN	NaN	NaN	NaN	0.915663	0.922783	1.07933	Y	2			___1	0.922992	2.76396e-08	152.54	120.87	147.3	0.065502	34283000	11214000	12443000	10626000	361	Q9QZR5;O88904	361;352	Q9QZR5	Q9QZR5	Homeodomain-interacting protein kinase 2;Homeodomain-interacting protein kinase 1	Hipk2;Hipk1	DFGSASHVSKAVCSTYLQSRYYRAPEIILGL
0.87413	0.97295	1.1743	0.8477	0.99366	1.2406	1.0273	0.83587	0.9358	1.0862	1.0083	1.0086	0.92205	0.97582	1.0505	0.91455	0.98687	1.0699	1.02478	0.951928	0.92205	1.0133	0.934667	0.91455	0.978902	0.949562	1.03265	Y	2			___1	0.99775	6.44467e-36	206.73	147.95	206.73	0.26986	193890000	61488000	65524000	66883000	359	Q9ERH7	359	Q9ERH7	Q9ERH7	Homeodomain-interacting protein kinase 3	Hipk3	DFGSASHVSKTVCSTYLQSRYYRAPEIILGL
0.93336	0.92741	0.96127	0.78842	0.9002	1.2005	NaN	NaN	NaN	1.9288	1.9859	1.0107	NaN	NaN	NaN	NaN	NaN	NaN	NaN	NaN	NaN	NaN	NaN	NaN	1.21686	1.27117	1.05749	Y	2			___1	1	3.5562e-06	124.38	81.534	124.12	-0.019498	8102600	2660600	3109800	2332200	89	P62806	89	P62806	P62806	Histone H4	Hist1h4a	TEHAKRKTVTAMDVVYALKRQGRTLYGFGG_
0.79826	1.0725	1.3443	0.95443	1.2101	1.108	NaN	NaN	NaN	NaN	NaN	NaN	NaN	NaN	NaN	NaN	NaN	NaN	NaN	NaN	NaN	NaN	NaN	NaN	0.876345	1.1413	1.22615	Y	2			___1	0.998916	0.000589849	89.171	46.939	72.434	0.32033	2392500	780380	874180	737900	493	P07901	493	P07901	P07901	Heat shock protein HSP 90-alpha	Hsp90aa1	LKDYCTRMKENQKHIYFITGETKDQVANSAF
1.0729	1.1979	1.1042	0.91727	1.0554	1.202	1.2443	0.8765	0.88329	1.0603	0.9689	1.0205	NaN	NaN	NaN	0.91087	0.90956	1.042	NaN	NaN	NaN	1.09943	0.959693	0.91087	1.07884	1.01168	1.02417	Y	2			___1	0.999237	1.68181e-05	136.02	82.949	136.02	0.30101	12671000	4326300	4206000	4138900	484	P11499	484	P11499	P11499	Heat shock protein HSP 90-beta	Hsp90ab1	LSEYVSRMKETQKSIYYITGESKEQVANSAF
1.363	0.9982	0.6253	1.1149	1.0183	0.85701	NaN	NaN	NaN	2.0404	1.8822	1.0291	NaN	NaN	NaN	NaN	NaN	NaN	NaN	NaN	NaN	NaN	NaN	NaN	1.5061	1.29957	0.837137	Y	3			___1	1	0.00507178	76.341	46.761	76.341	0.096989	3315900	955550	1403900	956490	336	Q61316	336	Q61316	Q61316	Heat shock 70 kDa protein 4	Hspa4	LRSVLEQSKLKKEDIYAVEIVGGATRIPAVK
0.76486	1.1138	1.3458	0.71492	1.0273	1.3214	1.1505	1.2196	1.1147	1.2679	1.3881	1.0688	1.4331	1.3646	1.0496	1.214	1.4366	0.99532	0.732815	0.952744	1.4331	0.696088	1.0047	1.214	0.887847	1.11771	1.24963	Y	3			___1	1	1.17799e-49	189.34	131.64	135.26	0.16854	64233000	18988000	22244000	23000000	27	Q9CQW9	27	Q9CQW9	Q9CQW9	Interferon-induced transmembrane protein 3	Ifitm3	ASGGQPPNYERIKEEYEVAEMGAPHGSASVR
0.94091	1.0495	1.1673	1.0328	0.98287	0.98607	NaN	NaN	NaN	NaN	NaN	NaN	NaN	NaN	NaN	NaN	NaN	NaN	NaN	NaN	NaN	NaN	NaN	NaN	0.986855	1.01618	1.07668	Y	2			___1	0.999768	0.00324986	99.788	64.61	99.788	0.091926	8801500	2599100	3531800	2670700	385	P14719	385	P14719	P14719	Interleukin-1 receptor-like 1	Il1rl1	VTPYKTRNDGKLYDAYIIYPRVFRGSAAGTH
0.7507	1.0949	1.363	0.79412	1.0891	1.3464	1.0094	1.147	1.1606	1.0535	1.1957	1.0491	1.0359	1.2666	1.1923	0.98549	1.2353	1.2348	0.789515	0.838715	1.0359	0.80952	0.809848	0.98549	0.867793	1.02921	1.15675	Y	3			___1	0.999716	1.88164e-40	156.47	130.38	156.47	-0.19155	88124000	29167000	25610000	33346000	357	P34902	357	P34902	P34902	Cytokine receptor common subunit gamma	Il2rg	LGEGPGGSPCSLHSPYWPPPCYSLKPEA___
0.69834	0.90628	1.3369	0.68382	0.84487	1.3001	0.90234	0.62518	0.90135	1.192	1.4211	1.3728	1.2066	1.2351	1.0334	1.0342	1.2685	1.1411	0.809651	0.967679	1.2066	0.788333	0.876347	1.0342	0.845747	0.940243	1.19199	Y	3			___1	0.991434	8.49626e-07	97.271	66.696	71.592	0.61884	23606000	8760200	7285600	7559900	603	P16382	603	P16382	P16382	Interleukin-4 receptor subunit alpha;Soluble interleukin-4 receptor subunit alpha	Il4r	QDPGVPGVRPSGDPGYKAFSSLLSSNGIRGD
NaN	NaN	NaN	NaN	NaN	NaN	NaN	NaN	NaN	NaN	NaN	NaN	0.6493	0.75962	1.0994	0.95107	0.85931	0.89444	1.31645	0.909587	0.6493	1.16372	1.11802	0.95107	1.24009	1.0138	0.800185	Y	3			___1	1	0.00384298	70.028	26.348	51.445	-3.8894	46623000	18278000	17167000	11179000	432	Q8K337	432	Q8K337	Q8K337	Type II inositol 1,4,5-trisphosphate 5-phosphatase	Inpp5b	AKVKFVRLVGIMLLLYVKQEHAAYISEVEAE
NaN	NaN	NaN	NaN	NaN	NaN	NaN	NaN	NaN	NaN	NaN	NaN	1.6086	0.22135	0.12977	1.5868	0.29983	0.18329	4.51773	7.70594	1.6086	3.33522	5.45583	1.5868	3.92648	6.58089	1.5977	Y	3			___1	0.999837	0.000149364	127.79	81.587	90.759	0.28973	6935400	2457500	4056600	421340	1166	Q9ES52	1166	Q9ES52	Q9ES52	Phosphatidylinositol 3,4,5-trisphosphate 5-phosphatase 1	Inpp5d	KSPAVLQLQHSKGRDYRDNTELPHHGKHRQE
2.1628	2.0793	0.87168	1.8574	1.7714	0.9176	NaN	NaN	NaN	NaN	NaN	NaN	1.4204	0.54762	0.39541	1.3167	0.52935	0.38401	1.82608	2.52902	1.4204	1.88911	2.6041	1.3167	1.93385	2.24595	1.1316	Y	2			___1	1	0.0030531	90.906	43.719	82.287	0.35333	74553000	19448000	37018000	18086000	868	Q9ES52	868	Q9ES52	Q9ES52	Phosphatidylinositol 3,4,5-trisphosphate 5-phosphatase 1	Inpp5d	EIKLQTSQGKMREKLYDFVKTERDESSGMKC
NaN	NaN	NaN	NaN	NaN	NaN	0.77302	0.51482	0.61834	0.865	0.51014	0.55277	2.7315	NaN	NaN	1.9334	NaN	NaN	NaN	NaN	2.7315	NaN	NaN	1.9334	0.81901	0.51248	0.585555	Y	3			___1	0.961173	8.76567e-22	132.77	115.62	77.533	0.072256	79540000	16105000	61311000	2124500	1021	Q9ES52	1021	Q9ES52	Q9ES52	Phosphatidylinositol 3,4,5-trisphosphate 5-phosphatase 1	Inpp5d	EDLLLTKPEMFENPLYGSVSSFPKLVPRKEQ
NaN	NaN	NaN	1.5391	2.8031	1.8663	2.1776	3.1959	1.498	1.8463	3.1486	1.8731	NaN	NaN	NaN	NaN	NaN	NaN	NaN	NaN	NaN	NaN	NaN	NaN	1.85433	3.0492	1.7458	Y	3			___1	0.939209	0.00021472	81.94	58.876	80.68	-0.075783	4309400	495070	1199200	2615200	987	Q6P549	987	Q6P549	Q6P549	Phosphatidylinositol 3,4,5-trisphosphate 5-phosphatase 2	Inppl1	GVAAPPPKNSFNNPAYYVLEGVPHQLLPLEP
1.1044	1.2002	0.99584	0.87365	1.0565	1.3882	1.1445	1.0009	0.93335	1.2125	0.92197	0.7621	NaN	NaN	NaN	NaN	NaN	NaN	NaN	NaN	NaN	NaN	NaN	NaN	1.08376	1.04489	1.01987	Y	3			___1	0.997834	3.85031e-05	70.889	36.672	62.858	0.22615	8677100	2640700	3338600	2697800	654	Q9JKF1	654	Q9JKF1	Q9JKF1	Ras GTPase-activating-like protein IQGAP1	Iqgap1	VGRTLSALRSPDVGLYGVIPECGETYQSDLA
0.65539	0.65446	1.0681	0.53862	0.51175	0.94701	NaN	NaN	NaN	NaN	NaN	NaN	NaN	NaN	NaN	NaN	NaN	NaN	NaN	NaN	NaN	NaN	NaN	NaN	0.597005	0.583105	1.00755	Y	3			___1	0.99933	0.000658015	86.213	55.62	86.213	-0.53784	2610200	1282800	686880	640540	814	P81122	814	P81122	P81122	Insulin receptor substrate 2	Irs2	RSYKAPCSCSGDNDQYVLMSSPVGRILEEER
0.39578	0.5516	1.4336	0.35716	0.30708	0.85621	NaN	NaN	NaN	NaN	NaN	NaN	NaN	NaN	NaN	0.55594	1.3232	2.362	NaN	NaN	NaN	0.755744	0.42337	0.55594	0.502895	0.42735	0.948583	Y	2			___1	0.989607	2.90515e-10	156.72	93.976	138.81	0.22855	3082500	1518900	732300	831250	734	P81122	734	P81122	P81122	Insulin receptor substrate 2	Irs2	YKASSPAESSPEDSGYMRMWCGSKLSMENPD
0.59422	0.49199	0.8444	0.58949	0.56083	1.0291	0.8346	0.62564	0.85965	NaN	NaN	NaN	NaN	NaN	NaN	NaN	NaN	NaN	NaN	NaN	NaN	NaN	NaN	NaN	0.67277	0.559487	0.91105	Y	2			___1	1	1.09222e-50	193.38	154.46	193.38	0.18675	8964400	4136100	2825700	2002600	649	P81122	649	P81122	P81122	Insulin receptor substrate 2	Irs2	GSHKSSSSNLGADDGYMPMTPGAALRSGGPN
0.44594	0.35159	0.75814	0.40521	0.41775	0.87683	0.52995	0.46418	0.85497	0.60941	NaN	NaN	NaN	NaN	NaN	NaN	NaN	NaN	NaN	NaN	NaN	NaN	NaN	NaN	0.460367	0.411173	0.82998	Y	2			___1	0.999955	2.20099e-15	151.59	123.62	151.59	-0.59849	9078600	4818100	2755700	1504800	671	P81122	671	P81122	P81122	Insulin receptor substrate 2	Irs2	AALRSGGPNSCKSDDYMPMSPTSVSAPKQIL
NaN	NaN	NaN	NaN	NaN	NaN	0.23717	0.19384	0.76922	0.17057	0.17591	0.86037	NaN	NaN	NaN	2.7819	0.85325	0.30991	NaN	NaN	NaN	1.17199	3.22674	2.7819	0.526576	1.19883	1.4705	Y	3			___1	0.976757	0.00027491	77.66	38.964	61.304	-0.27112	12936000	4331600	7284100	1320600	922	Q9Z0R6	922	Q9Z0R6	Q9Z0R6	Intersectin-2	Itsn2	LIPGNEVQRGEPEALYAAVTKKPTSTAYPVT
0.86419	0.67135	0.76512	0.73075	0.63871	0.84078	0.69123	0.60045	0.9089	0.67843	0.75789	1.1407	1.1796	1.0335	0.90102	1.1608	1.0735	0.88832	0.967586	1.10985	1.1796	0.931532	1.12572	1.1608	0.81062	0.817329	0.999317	Y	3			___1	1	6.29513e-05	126.71	82.938	90.913	-0.16649	53549000	19643000	19460000	14446000	570	Q62120	570	Q62120	Q62120	Tyrosine-protein kinase JAK2	Jak2	TFTKIFKGVRREVGDYGQLHKTEVLLKVLDK
1.2768	1.3215	1.0241	0.8463	1.1222	1.1207	NaN	NaN	NaN	NaN	NaN	NaN	NaN	NaN	NaN	NaN	NaN	NaN	NaN	NaN	NaN	NaN	NaN	NaN	1.06155	1.22185	1.0724	Y	2			___1	0.999429	0.00755493	76.326	26.611	76.326	0.60617	1260700	375620	473650	411410	294	Q9D3R6;Q3UMC0	294;393	Q9D3R6	Q9D3R6	Katanin p60 ATPase-containing subunit A-like 2;Spermatogenesis-associated protein 5	Katnal2;Spata5	QLFTGILSPWKGLLLYGPPGTGKTLLAKAVA
NaN	NaN	NaN	NaN	NaN	NaN	NaN	NaN	NaN	NaN	NaN	NaN	1.0891	1.1702	1.0337	1.031	1.2071	1.035	0.854555	0.967399	1.0891	0.828432	0.966184	1.031	0.841493	0.966791	1.06005	Y	2			___2	0.985752	0.00128346	80.871	30.584	80.871	-2.4725	6768500	2272200	1923500	2572800	276	P33175	276	P33175	P33175	Kinesin heavy chain isoform 5A	Kif5a	ALGNVISALAEGTKSYVPYRDSKMTRILQDS
0.75068	0.90269	1.2333	0.83277	0.97983	1.0839	1.1107	0.97173	1.1725	1.1306	1.2807	1.3567	NaN	NaN	NaN	NaN	NaN	NaN	NaN	NaN	NaN	NaN	NaN	NaN	0.956188	1.03374	1.2116	Y	3			___1	0.999971	5.41014e-50	183.18	129.6	183.18	0.0462	55759000	20763000	20249000	14747000	573	P05532	573	P05532	P05532	Mast/stem cell growth factor receptor Kit	Kit	VQWKVVEEINGNNYVYIDPTQLPYDHKWEFP
0.74231	0.7617	1.0909	0.70238	0.75574	1.0868	0.63858	0.76434	1.2508	0.61876	0.95097	1.3095	1.0711	1.1586	1.1032	1.2775	1.3128	1.0827	0.863111	0.906454	1.0711	0.761731	0.923617	1.2775	0.721145	0.843803	1.1811	Y	3			___1	1	5.31949e-16	159.18	129.07	115.12	-0.57371	104510000	38238000	37414000	28853000	902	P05532	902	P05532	P05532	Mast/stem cell growth factor receptor Kit	Kit	EGFRMVSPEHAPAEMYDVMKTCWDADPLKRP
NaN	NaN	NaN	NaN	NaN	NaN	1.1266	1.4131	1.2194	0.84776	1.0334	1.1186	NaN	NaN	NaN	1.0458	1.7966	1.3115	NaN	NaN	NaN	0.556607	0.762486	1.0458	0.843656	1.06966	1.12793	Y	3			___1	0.76588	4.77823e-13	96.466	80.215	49.589	-0.081173	53810000	18532000	17664000	17615000	732	P05532	732	P05532	P05532	Mast/stem cell growth factor receptor Kit	Kit	CDSSNEYMDMKPGVSYVVPTKTDKRRSARID
0.78739	0.82139	0.84986	0.78813	0.92436	1.0782	1.1018	1.1156	1.2869	0.82138	1.1068	1.235	NaN	NaN	NaN	NaN	NaN	NaN	NaN	NaN	NaN	NaN	NaN	NaN	0.874675	0.992037	1.11249	Y	3			___2	0.999999	7.88578e-31	136.77	117.65	131.37	-0.094698	731890000	234220000	256550000	241130000	723	P05532	723	P05532	P05532	Mast/stem cell growth factor receptor Kit	Kit	NLLHSTEPSCDSSNEYMDMKPGVSYVVPTKT
0.72154	0.87054	1.337	0.82617	0.79299	1.0415	0.72065	1.0095	1.1078	0.75454	1.0358	1.1677	0.9402	1.1271	1.2345	0.915	1.2271	1.2524	0.887233	0.810045	0.9402	0.81493	0.798467	0.915	0.78751	0.886224	1.08487	Y	3			___1	0.999999	7.88578e-31	136.77	117.65	131.37	-0.094698	731890000	234220000	256550000	241130000	723	P05532	723	P05532	P05532	Mast/stem cell growth factor receptor Kit	Kit	NLLHSTEPSCDSSNEYMDMKPGVSYVVPTKT
0.77639	0.82585	1.104	0.68739	0.75667	1.0892	0.57188	0.65883	1.0995	0.61349	0.69678	1.1589	1.0549	1.1854	1.1795	0.99352	1.0865	1.0761	0.843597	0.847817	1.0549	0.920387	0.929282	0.99352	0.735522	0.785871	1.08334	Y	3			___1	0.999999	2.90305e-20	184.24	112.05	172.21	0.22627	573300000	196310000	200750000	176240000	825	P05532	825	P05532	P05532	Mast/stem cell growth factor receptor Kit	Kit	ICDFGLARDIRNDSNYVVKGNARLPVKWMAP
0.79476	0.80226	0.85758	0.80043	0.82201	0.98946	1.0572	1.3042	1.0837	1.1445	1.2998	1.1612	1.0825	1.296	1.047	1.2736	1.2208	1.1083	0.771605	0.95511	1.0825	0.819135	0.902283	1.2736	0.897938	1.01428	1.07467	Y	3			___1	1	5.03071e-92	259.75	187.55	109.36	0.22092	1051200000	352110000	363760000	335300000	706	P05532	706	P05532	P05532	Mast/stem cell growth factor receptor Kit	Kit	SFIFSKQEEQAEAALYKNLLHSTEPSCDSSN
0.85556	0.89184	1.0129	0.84864	0.89715	1.0765	1.1173	1.2968	1.0856	1.1716	1.4371	1.1097	NaN	NaN	NaN	NaN	NaN	NaN	NaN	NaN	NaN	NaN	NaN	NaN	0.998275	1.13072	1.07118	Y	3			___1	0.999987	7.94953e-32	152.13	109.39	148.64	-0.46584	87206000	30472000	32465000	24269000	571	P05532	571	P05532	P05532	Mast/stem cell growth factor receptor Kit	Kit	YEVQWKVVEEINGNNYVYIDPTQLPYDHKWE
0.74629	0.76469	1.0368	0.74745	0.73212	0.92959	NaN	NaN	NaN	NaN	NaN	NaN	1.0112	1.1584	1.1435	1.1738	1.4217	1.1122	0.86326	0.874508	1.0112	0.703383	0.899119	1.1738	0.765096	0.817609	1.03785	Y	2			___1	0.999999	2.34966e-38	212.28	160.11	212.28	0.082539	44575000	14907000	15033000	14634000	612	P05532	612	P05532	P05532	Mast/stem cell growth factor receptor Kit	Kit	TLGAGAFGKVVEATAYGLIKSDAAMTVAVKM
0.78383	0.74061	0.81053	0.78813	0.92436	1.0782	0.86222	1.0376	1.0785	NaN	NaN	NaN	NaN	NaN	NaN	NaN	NaN	NaN	NaN	NaN	NaN	NaN	NaN	NaN	0.811393	0.900857	0.989077	Y	3			___2	0.76588	4.77823e-13	96.466	80.215	49.589	-0.081173	53810000	18532000	17664000	17615000	732	P05532	732	P05532	P05532	Mast/stem cell growth factor receptor Kit	Kit	CDSSNEYMDMKPGVSYVVPTKTDKRRSARID
0.86222	0.8565	0.82206	0.73999	0.7509	0.97613	NaN	NaN	NaN	NaN	NaN	NaN	NaN	NaN	NaN	NaN	NaN	NaN	NaN	NaN	NaN	NaN	NaN	NaN	0.801105	0.8037	0.899095	Y	2			___1	0.999995	0.000233364	96.866	65.651	96.866	1.0572	12503000	4896400	4521900	3084300	556	P05532	556	P05532	P05532	Mast/stem cell growth factor receptor Kit	Kit	IIVMVLTYKYLQKPMYEVQWKVVEEINGNNY
0.86181	0.77658	0.93607	0.86795	0.73025	0.78414	NaN	NaN	NaN	NaN	NaN	NaN	NaN	NaN	NaN	NaN	NaN	NaN	NaN	NaN	NaN	NaN	NaN	NaN	0.86488	0.753415	0.860105	Y	4			___1	0.997399	1.14905e-07	90.778	71.655	87.748	0.23742	26864000	9729800	10327000	6806900	581	P05532	581	P05532	P05532	Mast/stem cell growth factor receptor Kit	Kit	INGNNYVYIDPTQLPYDHKWEFPRNRLSFGK
4.4551	8.4342	1.8923	NaN	NaN	NaN	3.2344	6.7745	2.404	3.8552	7.4439	2.0023	3.1105	0.6119	0.19311	1.302	NaN	NaN	1.63425	5.17839	3.1105	NaN	NaN	1.302	3.29474	6.95775	2.35228	Y	3			___1	0.925577	1.5551e-21	150.9	117.13	124.91	0.061789	24510000	3864000	10931000	9715000	59	Q9JHL0	59	Q9JHL0	Q9JHL0	Linker for activation of T-cells family member 2	Lat2	RNRQENAQSSAAAQTYSLARQVWPGPQMDTA
NaN	NaN	NaN	NaN	NaN	NaN	1.2681	1.6008	1.416	1.1841	1.6914	1.336	NaN	NaN	NaN	1.5803	0.83592	0.42564	NaN	NaN	NaN	1.19629	2.3494	1.5803	1.21616	1.88053	1.4441	Y	3			___1	0.99744	5.03396e-43	191.89	146.27	80.411	-0.1379	187450000	56205000	99345000	31901000	98	Q9JHL0	98	Q9JHL0	Q9JHL0	Linker for activation of T-cells family member 2	Lat2	NKMLFSHLEGPESPRYQNFYKGSNQEPDAAY
23.221	21.64	0.91583	61.406	57.789	0.8962	7.0481	5.5239	0.84513	6.074	4.5487	0.83945	1.1962	0.28116	0.19353	1.4094	0.40473	0.30979	3.55669	5.16716	1.1962	2.47078	3.22799	1.4094	17.2961	16.3161	1.01703	Y	3			___2	0.99744	5.03396e-43	191.89	146.27	80.411	-0.1379	187450000	56205000	99345000	31901000	98	Q9JHL0	98	Q9JHL0	Q9JHL0	Linker for activation of T-cells family member 2	Lat2	NKMLFSHLEGPESPRYQNFYKGSNQEPDAAY
NaN	NaN	NaN	0.45608	0.30744	0.64512	0.53687	0.37696	0.56003	0.39451	0.19517	0.74695	1.5147	0.18318	0.11318	2.171	0.30051	0.1274	5.45911	8.83548	1.5147	3.32768	7.84929	2.171	2.03485	3.51287	1.12756	Y	2			___1	0.980517	4.21086e-24	190.41	146.61	121.92	0.40907	45854000	16414000	25631000	3809200	394	P06240;P39688;Q04736	394;420;424	P06240	P06240	Proto-oncogene tyrosine-protein kinase LCK;Tyrosine-protein kinase Fyn;Tyrosine-protein kinase Yes	Lck;Fyn;Yes1	KIADFGLARLIEDNEYTAREGAKFPIKWTAP
1.415	1.9766	1.4773	1.224	2.3714	1.5317	1.4032	2.0177	1.5591	1.3257	2.2024	1.7194	NaN	NaN	NaN	NaN	NaN	NaN	NaN	NaN	NaN	NaN	NaN	NaN	1.34198	2.14202	1.57188	Y	2			___1	1	4.41167e-66	219.96	156.28	213.64	0.19338	11068000	2360400	3530500	5177500	28	Q61233	28	Q61233	Q61233	Plastin-2	Lcp1	ELREAFAKVDTDGNGYISCNELNDLFKAACL
0.90274	0.98782	1.2222	0.85344	1.0067	1.1749	0.84576	0.87696	0.99847	0.86352	0.8977	1.016	0.95629	0.82414	0.87093	1.0268	0.96715	0.97612	1.21339	1.1482	0.95629	1.03397	1.02446	1.0268	0.952135	0.990307	1.06578	Y	2			___1	1	7.07647e-26	190.51	114.97	190.51	0.17729	330220000	119680000	116160000	94381000	124	Q61233;Q99K51	124;127	Q61233;Q99K51	Q61233	Plastin-2;Plastin-3	Lcp1;Pls3	LSSEGTQHSYSEEEKYAFVNWINKALENDPD;QSSVGTQHSYSEEEKYAFVNWINKALENDPD
0.85744	1.0991	1.2441	0.933	1.103	1.1743	1.0736	1.0513	1.0366	1.2332	1.562	1.1318	0.84623	0.81148	0.9755	NaN	NaN	NaN	1.23232	1.02512	0.84623	NaN	NaN	NaN	1.06591	1.1681	1.08661	Y	2			___1	0.997442	1.35886e-10	160.56	89.075	157.03	0.44505	20289000	7374700	7526500	5387700	239	P06151	239	P06151	P06151	L-lactate dehydrogenase A chain	Ldha	KEQWKEVHKQVVDSAYEVIKLKGYTSWAIGL
0.77892	0.98256	1.3253	0.96965	1.1032	1.0487	NaN	NaN	NaN	NaN	NaN	NaN	NaN	NaN	NaN	NaN	NaN	NaN	NaN	NaN	NaN	NaN	NaN	NaN	0.874285	1.04288	1.187	Y	2			___1	1	5.94174e-22	187.11	97.03	187.11	0.0061657	2277400	755190	857590	664650	70	O08573	70	O08573	O08573	Galectin-9	Lgals9	NDIAFHFNPRFEEGGYVVCNTKQNGQWGPEE
0.79984	0.798	1.0022	0.79475	0.84861	0.92928	1.2358	1.5572	1.1281	1.5432	1.6636	0.98733	NaN	NaN	NaN	NaN	NaN	NaN	NaN	NaN	NaN	NaN	NaN	NaN	1.0934	1.21685	1.01173	Y	3			___1	0.998595	1.43516e-13	103.88	79.627	89.631	0.2032	12300000	3358100	4642300	4299900	300	Q64281	300	Q64281	Q64281	Leukocyte immunoglobulin-like receptor subfamily B member 4	Lilrb4	LNSWNPQNEDPQGIVYAQVKPSRLQKDTACK
0.71461	1.0548	1.0714	0.78228	1.1227	1.1224	NaN	NaN	NaN	NaN	NaN	NaN	NaN	NaN	NaN	NaN	NaN	NaN	NaN	NaN	NaN	NaN	NaN	NaN	0.748445	1.08875	1.0969	Y	2			___1	0.988868	7.95708e-10	112.74	65.726	112.74	0.30582	2158500	642030	866160	650310	289	Q8K1T1	289	Q8K1T1	Q8K1T1	Leucine-rich repeat-containing protein 25	Lrrc25	CYMNYRSVDQDSQPVYCNLESLGR_______
0.97339	0.94578	1.0185	0.96017	0.77308	0.74559	0.26378	0.22425	0.79695	0.28752	0.23101	0.81725	2.4224	0.17945	0.073881	2.6897	0.21039	0.074423	5.57258	13.5353	2.4224	4.75308	13.4367	2.6897	2.13509	4.85769	1.41506	Y	2			___1	0.995645	5.83634e-17	172.26	130.94	118.28	0.16028	275880000	85204000	172560000	18120000	397	P25911	397	P25911	P25911	Tyrosine-protein kinase Lyn	Lyn	KIADFGLARVIEDNEYTAREGAKFPIKWTAP
1.0978	1.1934	1.2386	0.93206	1.1691	1.2037	1.331	1.5324	1.0779	1.3977	1.4861	1.1515	NaN	NaN	NaN	NaN	NaN	NaN	NaN	NaN	NaN	NaN	NaN	NaN	1.18964	1.34525	1.16793	Y	2			___1	1	1.86907e-66	230.96	192.19	206.45	-0.24493	42364000	12751000	15498000	14115000	473	P25911	473	P25911	P25911	Tyrosine-protein kinase Lyn	Lyn	QGYRMPRMENCPDELYDIMKMCWKEKAEERP
0.98358	1.1399	1.0132	1.121	1.1141	1.022	NaN	NaN	NaN	NaN	NaN	NaN	NaN	NaN	NaN	NaN	NaN	NaN	NaN	NaN	NaN	NaN	NaN	NaN	1.05229	1.127	1.0176	Y	3			___1	0.791267	2.7208e-10	120.08	90.474	83.423	-0.35117	4326400	1398500	1695900	1232000	265	P25911	265	P25911	P25911	Tyrosine-protein kinase Lyn	Lyn	VKKLGAGQFGEVWMGYYNNSTKVAVKTLKPG
1.1332	1.1759	0.97006	1.1194	1.2193	0.98535	NaN	NaN	NaN	0.97136	0.9645	1.0749	NaN	NaN	NaN	NaN	NaN	NaN	NaN	NaN	NaN	NaN	NaN	NaN	1.07465	1.1199	1.0101	Y	3			___1	0.999924	7.08017e-10	108.34	88.262	108.34	0.1367	8650800	2711300	3263100	2676300	316	P25911	316	P25911	P25911	Tyrosine-protein kinase Lyn	Lyn	KLVRLYAVVTKEEPIYIITEFMAKGSLLDFL
1.2315	1.0627	0.89876	1.2957	1.1022	0.95017	1.2508	1.1134	1.2086	1.4094	1.5519	1.1982	1.0389	1.0789	0.92822	1.0612	1.1537	1.0267	0.92687	1.07733	1.0389	0.866776	0.973994	1.0612	1.16351	1.14692	1.05931	Y	3			___1	0.998778	1.14075e-28	194.98	136.84	141.82	-0.36849	45804000	14057000	17808000	13940000	194	P25911;P16277	194;182	P25911	P25911	Tyrosine-protein kinase Lyn;Tyrosine-protein kinase Blk	Lyn;Blk	VIKHYKIRSLDNGGYYISPRITFPCISDMIK
1.5876	0.69409	0.45049	1.091	1.3659	1.2917	1.2508	1.1134	1.2086	NaN	NaN	NaN	NaN	NaN	NaN	NaN	NaN	NaN	NaN	NaN	NaN	NaN	NaN	NaN	1.3098	1.0578	0.983597	Y	2			___1	0.847422	1.14075e-28	194.98	136.84	125.97	-0.13494	4408900	1178500	1852800	1377600	193	P25911;P16277	193;181	P25911	P25911	Tyrosine-protein kinase Lyn;Tyrosine-protein kinase Blk	Lyn;Blk	DVIKHYKIRSLDNGGYYISPRITFPCISDMI
0.88952	0.97606	0.89763	0.73275	0.94913	1.2524	NaN	NaN	NaN	NaN	NaN	NaN	NaN	NaN	NaN	NaN	NaN	NaN	NaN	NaN	NaN	NaN	NaN	NaN	0.811135	0.962595	1.07502	Y	3			___1	1	0.000192556	117.14	81.471	111.27	0.33935	5470900	1994500	1704200	1772200	255	Q8BW75	255	Q8BW75	Q8BW75	Amine oxidase [flavin-containing] B	Maob	QTGENVIVKTLNHEIYEAKYVISAIPPALGM
6.3251	3.4028	0.51838	6.205	3.5677	0.5745	2.9375	1.3391	0.54323	3.1314	1.5228	0.58444	1.3153	0.15937	0.11807	1.2592	0.1563	0.12352	6.27471	8.46955	1.3153	6.39795	8.09585	1.2592	5.21194	4.39963	0.799175	Y	2			___1	0.999996	1.99603e-49	214.81	161.8	172.06	0.032861	12778000000	4441900000	7146700000	1189500000	185	P63085	185	P63085	P63085	Mitogen-activated protein kinase 1	Mapk1	RVADPDHDHTGFLTEYVATRWYRAPEIMLNS
49.319	23.584	0.47933	61.348	32.552	0.54783	6.2767	3.3926	0.60614	6.3391	3.3567	0.61522	1.2646	0.1165	0.088941	1.2443	0.1143	0.093203	8.58369	11.2434	1.2646	8.74891	10.7293	1.2443	23.4359	14.143	0.792903	Y	2			___2	0.999996	1.99603e-49	214.81	161.8	172.06	0.032861	12778000000	4441900000	7146700000	1189500000	185	P63085	185	P63085	P63085	Mitogen-activated protein kinase 1	Mapk1	RVADPDHDHTGFLTEYVATRWYRAPEIMLNS
13.111	10.016	0.78181	13.8	10.652	0.78879	4.0495	2.6702	0.76209	3.9364	2.5602	0.78646	0.88254	0.076832	0.087628	0.93225	0.077609	0.081748	13.0154	11.4119	0.88254	12.8851	12.2327	0.93225	10.1329	8.25717	0.822323	Y	2			___1	1	1.18168e-66	237.07	188.46	210.39	0.3695	815920000	290190000	401400000	124320000	182	P47811	182	P47811	P47811	Mitogen-activated protein kinase 14	Mapk14	LDFGLARHTDDEMTGYVATRWYRAPEIMLNW
11.494	9.7906	0.86551	11.037	9.5275	0.90322	2.972	1.9887	0.78464	2.8282	2.0798	0.78402	1.1807	0.16922	0.13932	1.2048	0.16587	0.13906	5.90947	7.17772	1.1807	6.02882	7.19114	1.2048	6.71158	6.29258	0.953815	Y	2			___1	0.999973	1.65392e-53	204.78	162.57	157.12	-0.044744	9765800000	3296400000	5215800000	1253600000	205	Q63844	205	Q63844	Q63844	Mitogen-activated protein kinase 3	Mapk3	RIADPEHDHTGFLTEYVATRWYRAPEIMLNS
56.544	43.39	0.77568	74.108	64.978	0.88144	4.1472	2.9958	0.86155	4.3378	3.3177	0.88841	1.1613	0.12974	0.10786	1.0986	0.1056	0.094369	7.70772	9.27128	1.1613	9.4697	10.5967	1.0986	26.0524	22.4249	0.944497	Y	2			___2	0.999973	1.65392e-53	204.78	162.57	157.12	-0.044744	9765800000	3296400000	5215800000	1253600000	205	Q63844	205	Q63844	Q63844	Mitogen-activated protein kinase 3	Mapk3	RIADPEHDHTGFLTEYVATRWYRAPEIMLNS
1.1779	1.5187	1.3457	1.2275	1.0143	1.0904	1.4693	1.8285	1.1521	NaN	NaN	NaN	NaN	NaN	NaN	NaN	NaN	NaN	NaN	NaN	NaN	NaN	NaN	NaN	1.29157	1.45383	1.19607	Y	3			___1	0.832643	1.96573e-06	100.39	70.811	89.913	-0.20999	4177300	1147400	1380800	1649100	221	Q9WVS8	221	Q9WVS8	Q9WVS8	Mitogen-activated protein kinase 7	Mapk7	GLCTSPAEHQYFMTEYVATRWYRAPELMLSL
6.7464	7.754	1.1918	9.3192	10.624	1.173	2.5391	1.8686	0.92293	2.2217	1.5782	0.84832	NaN	NaN	NaN	NaN	NaN	NaN	NaN	NaN	NaN	NaN	NaN	NaN	5.2066	5.4562	1.03401	Y	2			___1	0.999906	7.00053e-102	257.04	178.64	257.04	-0.034181	24981000	2211200	12246000	10524000	185	Q91Y86;Q61831	185;223	Q91Y86	Q91Y86	Mitogen-activated protein kinase 8;Mitogen-activated protein kinase 10	Mapk8;Mapk10	FGLARTAGTSFMMTPYVVTRYYRAPEVILGM
NaN	NaN	NaN	NaN	NaN	NaN	2.037	2.319	1.3004	1.8483	2.0525	1.1751	NaN	NaN	NaN	NaN	NaN	NaN	NaN	NaN	NaN	NaN	NaN	NaN	1.94265	2.18575	1.23775	Y	2			___2	0.99998	4.31911e-182	308.03	275.73	155.16	-0.31685	124820000	24305000	55381000	45135000	185	Q9WTU6	185	Q9WTU6	Q9WTU6	Mitogen-activated protein kinase 9	Mapk9	FGLARTACTNFMMTPYVVTRYYRAPEVILGM
9.0531	11.805	1.234	8.9196	11.049	1.3126	1.8747	1.6217	1.0523	1.8477	1.8498	1.0064	1.3859	0.25461	0.17438	0.78887	0.63346	0.6434	3.92758	5.7346	1.3859	1.57863	1.55424	0.78887	4.53355	5.60239	1.13001	Y	2			___1	0.99998	4.31911e-182	308.03	275.73	155.16	-0.31685	124820000	24305000	55381000	45135000	185	Q9WTU6	185	Q9WTU6	Q9WTU6	Mitogen-activated protein kinase 9	Mapk9	FGLARTACTNFMMTPYVVTRYYRAPEVILGM
0.81039	1.0983	1.3674	0.83356	1.0146	1.1593	NaN	NaN	NaN	NaN	NaN	NaN	NaN	NaN	NaN	NaN	NaN	NaN	NaN	NaN	NaN	NaN	NaN	NaN	0.821975	1.05645	1.26335	Y	3			___1	0.999996	1.8651e-10	116.85	87.268	97.271	-0.4404	3543600	1041100	1365200	1137300	277	Q922T2	277	Q922T2	Q922T2	Microfibril-associated glycoprotein 3	Mfap3	ERIKERPALDAQSGIYVINPELGRSNSPGGD
0.79914	0.7793	0.91	0.53164	0.77132	1.4617	NaN	NaN	NaN	NaN	NaN	NaN	NaN	NaN	NaN	0.90925	1.2326	1.3371	NaN	NaN	NaN	0.811293	0.747887	0.90925	0.714024	0.766169	1.09365	Y	3			___1	0.999995	5.18271e-20	162.46	118.87	71.531	-0.26615	3515300	1254600	991210	1269500	562	P19467	562	P19467	P19467	Mucin-13	Muc13	FPKVRTGVPSQTPNPYANQRSMPRPDY____
0.70621	0.75838	1.0809	0.77455	0.95357	0.97012	NaN	NaN	NaN	NaN	NaN	NaN	NaN	NaN	NaN	NaN	NaN	NaN	NaN	NaN	NaN	NaN	NaN	NaN	0.74038	0.855975	1.02551	Y	3			___1	0.999713	3.23193e-10	126.56	85.919	126.56	-0.099211	2612700	1036200	906190	670300	754	Q8VDD5	754	Q8VDD5	Q8VDD5	Myosin-9	Myh9	ACVLMIKALELDSNLYRIGQSKVFFRAGVLA
3.872	2.478	0.7005	NaN	NaN	NaN	1.7101	1.2479	0.72262	1.6424	1.2452	0.71497	NaN	NaN	NaN	NaN	NaN	NaN	NaN	NaN	NaN	NaN	NaN	NaN	2.40817	1.65703	0.712697	Y	3			___1	0.944791	2.66231e-06	68.074	46.725	68.074	-0.13671	17243000	3232900	8826600	5183100	110	O55033	110	O55033	O55033	Cytoplasmic protein NCK2	Nck2	TDAEYPANGSGADRIYDLNIPAFVKFAYVAE
NaN	NaN	NaN	0.82901	1.3688	1.0473	NaN	NaN	NaN	NaN	NaN	NaN	0.86009	0.97143	1.0133	0.92864	0.88533	0.9712	1.02941	0.986875	0.86009	1.12952	1.02965	0.92864	0.995981	1.12844	0.945343	Y	3			___1	0.999465	0.00629007	58.079	25.549	58.079	0.35638	8632800	3152300	2963600	2516800	403	Q8BZW8	403	Q8BZW8	Q8BZW8	NHL repeat-containing protein 2	Nhlrc2	IRFAGSGNEENRNNAYPHKAGFAQPSGLALA
1.2523	0.91369	0.83482	1.0419	1.0276	0.96889	1.3572	2.0206	1.3392	1.7565	1.5983	0.90335	NaN	NaN	NaN	0.89002	1.1498	1.2381	NaN	NaN	NaN	0.869716	0.807689	0.89002	1.25552	1.27358	0.987256	Y	3			___1	0.999995	3.45416e-12	145.83	115.35	145.83	-0.47322	13643000	4238600	4444200	4959900	111	Q62422	111	Q62422	Q62422	Osteoclast-stimulating factor 1	Ostf1	RVGVNGLDKAGSTALYWACHGGHKDIVEVLF
0.74759	0.80449	1.1174	0.41372	0.63223	1.4733	NaN	NaN	NaN	NaN	NaN	NaN	NaN	NaN	NaN	NaN	NaN	NaN	NaN	NaN	NaN	NaN	NaN	NaN	0.580655	0.71836	1.29535	Y	3			___1	0.937939	0.000534182	101.38	70.2	101.38	-0.60479	1753600	748060	531310	474250	382	Q9Z1M0	382	Q9Z1M0	Q9Z1M0	P2X purinoceptor 7	P2rx7	VYPYCKCCEPCTVNEYYYRKKCESIMEPKPT
1.1804	0.90102	0.85664	1.0565	1.3021	1.1794	NaN	NaN	NaN	NaN	NaN	NaN	NaN	NaN	NaN	NaN	NaN	NaN	NaN	NaN	NaN	NaN	NaN	NaN	1.11845	1.10156	1.01802	Y	3			___1	0.997255	1.92501e-06	113.95	71.887	113.95	-0.048316	2482200	915850	879020	687290	28	P63005	28	P63005	P63005	Platelet-activating factor acetylhydrolase IB subunit alpha	Pafah1b1	RAIADYLRSNGYEEAYSVFKKEAELDMNEEL
1.02	0.75189	0.73859	1.0091	0.69612	0.66441	0.54977	0.49393	0.93131	0.542	0.42276	0.78179	1.4738	0.60823	0.37134	1.4602	0.55531	0.35822	1.64411	2.69295	1.4738	1.8008	2.79158	1.4602	1.0943	1.3082	1.00835	Y	2			___1	0.999931	1.70663e-10	160.52	106.73	160.52	0.20382	42301000	15359000	18493000	8448300	224	Q3U1F9	224	Q3U1F9	Q3U1F9	Phosphoprotein associated with glycosphingolipid-enriched microdomains 1	Pag1	ELQGAPMEGKADFAEYASVDRNKKCRHSANA
NaN	NaN	NaN	1.2313	1.1524	0.86319	1.3707	1.4082	0.79671	1.7152	1.2082	0.60145	1.0811	0.55225	0.51965	0.93127	0.66081	0.71492	1.81077	1.92437	1.0811	1.51329	1.39876	0.93127	1.52825	1.41839	0.854744	Y	4			___1	0.960323	5.20506e-27	144.63	121.65	117.51	-0.16476	29527000	9932900	13660000	5934200	314	Q3U1F9	314	Q3U1F9	Q3U1F9	Phosphoprotein associated with glycosphingolipid-enriched microdomains 1	Pag1	REEDPTLTEEEISAMYSSVNKPGQSAHKPGP
NaN	NaN	NaN	1.2129	0.78926	0.61442	0.44264	0.26119	0.58402	0.49273	0.34386	0.61093	1.1463	0.51102	0.41842	1.2717	0.48668	0.37802	1.95687	2.38994	1.1463	2.05474	2.64536	1.2717	1.23198	1.28592	0.845474	Y	2			___1	0.999938	6.08689e-31	190.24	129.94	162.67	-0.34899	9026100	3885600	3757600	1382900	356	Q3U1F9	356	Q3U1F9	Q3U1F9	Phosphoprotein associated with glycosphingolipid-enriched microdomains 1	Pag1	MKGLPQRSSSSCNDLYATVKDFEKTPNSIST
1.2614	1.4319	1.137	1.724	1.1697	0.65765	0.50982	0.29675	0.64513	0.52654	0.34122	0.64959	0.86266	NaN	NaN	1.5286	NaN	NaN	NaN	NaN	0.86266	NaN	NaN	1.5286	1.00544	0.809892	0.772342	Y	2			___1	1	9.24803e-110	263.07	203.21	263.07	0.064773	26548000	11503000	11355000	3690400	165	Q3U1F9	165	Q3U1F9	Q3U1F9	Phosphoprotein associated with glycosphingolipid-enriched microdomains 1	Pag1	ARAADTELGPGVEGPYEVLKDSSSQENMVED
NaN	NaN	NaN	NaN	NaN	NaN	0.78239	0.35821	0.46038	0.80699	0.41535	0.51489	NaN	NaN	NaN	NaN	NaN	NaN	NaN	NaN	NaN	NaN	NaN	NaN	0.79469	0.38678	0.487635	Y	2			___1	0.999865	6.92648e-24	186.05	149.76	142.45	0.068257	2410600	1056600	962980	390960	414	Q3U1F9	414	Q3U1F9	Q3U1F9	Phosphoprotein associated with glycosphingolipid-enriched microdomains 1	Pag1	VPLETNGHHVPKESDYESIGDLQQCRDVTRL
1.142	1.3645	1.2231	1.0881	1.2862	1.2776	1.479	1.6759	1.2196	1.4963	1.627	1.2461	1.0945	0.7244	0.68059	1.0794	0.72422	0.65464	1.38045	1.46931	1.0945	1.3808	1.52756	1.0794	1.32777	1.49175	1.19005	Y	2			___1	1	5.03544e-41	204.17	144.55	139.66	-0.13069	532430000	172490000	208030000	151900000	21	O88428	21	O88428	O88428	Bifunctional 3'-phosphoadenosine 5'-phosphosulfate synthase 2;Sulfate adenylyltransferase;Adenylyl-sulfate kinase	Papss2	KMNHKRDQQKSTNVVYQAHHVSRNKRGQVVG
1.2272	1.1547	1.005	1.0277	1.1859	1.2094	NaN	NaN	NaN	NaN	NaN	NaN	1.203	0.83139	0.64787	1.1588	0.71012	0.59993	1.2028	1.54352	1.203	1.40821	1.66686	1.1588	1.21648	1.38775	1.14405	Y	2			___1	0.999293	4.38751e-08	147.74	93.021	140.78	0.53513	17583000	5203200	7436100	4944100	702	Q08481	702	Q08481	Q08481	Platelet endothelial cell adhesion molecule	Pecam1	LEPHQALGTRATETVYSEIRKVDPNLMENRY
0.85807	1.0507	1.1989	0.91966	1.1973	1.314	NaN	NaN	NaN	NaN	NaN	NaN	NaN	NaN	NaN	NaN	NaN	NaN	NaN	NaN	NaN	NaN	NaN	NaN	0.888865	1.124	1.25645	Y	3			___1	0.984394	7.48154e-33	175.27	133.53	91.592	0.13761	8122000	2633100	3094100	2394700	26	Q9DBJ1	26	Q9DBJ1	Q9DBJ1	Phosphoglycerate mutase 1	Pgam1	HGESAWNLENRFSGWYDADLSPAGHEEAKRG
0.90242	1.0294	1.1448	0.87705	0.79958	0.93148	1.1084	1.1972	1.0839	1.2854	1.0588	0.95124	0.77469	0.92773	1.0862	0.85841	0.98057	1.1939	1.0779	0.920641	0.77469	1.01981	0.837591	0.85841	1.04516	0.973869	0.95742	Y	2			___1	0.999997	2.0117e-07	116.9	68.911	108.47	-0.2856	111250000	38910000	37210000	35126000	92	Q9DBJ1;O70250	92;92	Q9DBJ1	Q9DBJ1	Phosphoglycerate mutase 1;Phosphoglycerate mutase 2	Pgam1;Pgam2	MWLPVVRTWRLNERHYGGLTGLNKAETAAKH
NaN	NaN	NaN	NaN	NaN	NaN	NaN	NaN	NaN	NaN	NaN	NaN	0.94632	1.136	1.2173	0.76942	1.1399	1.236	0.880282	0.82149	0.94632	0.87727	0.809062	0.76942	0.878776	0.815276	0.85787	Y	2			___1	1	2.86354e-06	144.7	100.57	126.03	-0.22699	28968000	9789000	9154500	10025000	523	O35904	523	O35904	O35904	Phosphatidylinositol 4,5-bisphosphate 3-kinase catalytic subunit delta isoform	Pik3cd	LQLREILERRGSGELYEHEKDLVWKMRHEVQ
0.95387	0.84689	0.87322	0.83024	0.79722	0.85811	1.1076	1.0822	1.0906	1.1942	1.5345	1.0828	NaN	NaN	NaN	NaN	NaN	NaN	NaN	NaN	NaN	NaN	NaN	NaN	1.02148	1.0652	0.976183	Y	2			___1	0.999339	5.71336e-07	142.83	103.05	84.753	-0.31174	21610000	7981700	7898000	5730500	580	P26450	580	P26450	P26450	Phosphatidylinositol 3-kinase regulatory subunit alpha	Pik3r1	SIKPDLIQLRKTRDQYLMWLTQKGVRQKKLN
NaN	NaN	NaN	1.2238	1.1239	0.85189	NaN	NaN	NaN	NaN	NaN	NaN	0.67233	0.74694	1.064	0.71551	0.74576	1.1175	1.3388	0.93985	0.67233	1.34091	0.894855	0.71551	1.30117	0.986201	0.746577	Y	3			___1	1	2.04967e-05	127.52	95.744	127.52	-0.86858	5958800	2228400	1909900	1820500	452	P26450	452	P26450	P26450	Phosphatidylinositol 3-kinase regulatory subunit alpha	Pik3r1	VKEDNIEAVGKKLHEYNTQFQEKSREYDRLY
1.1467	0.93576	0.8202	0.92019	1.0234	0.89167	1.3159	0.90543	0.79349	1.2258	1.0661	0.92907	1.1364	1.3482	1.0827	1.3035	1.4055	1.0179	0.74173	0.923617	1.1364	0.711491	0.982415	1.3035	1.0103	0.972787	0.979055	Y	3			___1	0.998832	0.00107724	79.659	47.63	79.659	-0.45039	28985000	8648700	11442000	8894700	467	P26450;Q64143	467;199	P26450	P26450	Phosphatidylinositol 3-kinase regulatory subunit alpha;Phosphatidylinositol 3-kinase regulatory subunit gamma	Pik3r1;Pik3r3	YNTQFQEKSREYDRLYEEYTRTSQEIQMKRT
0.962	0.92937	1.005	0.79048	0.88288	1.1879	1.1883	1.4393	1.0891	1.2388	1.6125	1.2469	NaN	NaN	NaN	NaN	NaN	NaN	NaN	NaN	NaN	NaN	NaN	NaN	1.0449	1.21601	1.13222	Y	2			___1	1	0.000181679	92.19	39.072	89.266	-0.030223	7066700	2381300	2596800	2088600	148	P52480	148	P52480	P52480	Pyruvate kinase PKM	Pkm	ELKKGATLKITLDNAYMEKCDENILWLDYKN
1.8457	1.9381	1.0226	1.6684	1.9062	0.98345	1.7881	1.9005	1.2132	NaN	NaN	NaN	NaN	NaN	NaN	NaN	NaN	NaN	NaN	NaN	NaN	NaN	NaN	NaN	1.7674	1.91493	1.07308	Y	3			___1	0.999408	9.00866e-09	89.08	66.738	69.248	0.032161	7626100	1624500	3163200	2838400	783	Q62077	783	Q62077	Q62077	1-phosphatidylinositol 4,5-bisphosphate phosphodiesterase gamma-1	Plcg1	EPDYGALYEGRNPGFYVEANPMPTFKCAVKA
1.8417	1.5193	0.88435	2.1492	1.4345	0.72866	2.1957	1.7874	0.96447	2.3427	1.7498	0.89464	1.0063	0.35768	0.34666	1.0574	0.47702	0.42022	2.7958	2.88467	1.0063	2.09635	2.37971	1.0574	2.23691	1.95923	0.922637	Y	3			___1	0.999998	1.93405e-62	232.73	167.67	232.73	0.05429	50216000	17226000	22104000	10886000	1217	Q8CIH5	1217	Q8CIH5	Q8CIH5	1-phosphatidylinositol 4,5-bisphosphate phosphodiesterase gamma-2	Plcg2	QLRRRQEELNNQLFLYDTHQNLRGANRDALV
1.7091	1.7026	0.99591	1.3927	0.77675	0.53572	NaN	NaN	NaN	NaN	NaN	NaN	NaN	NaN	NaN	NaN	NaN	NaN	NaN	NaN	NaN	NaN	NaN	NaN	1.5509	1.23967	0.765815	Y	2			___1	1	4.59556e-07	144.73	102.21	144.73	-0.11954	2321600	567160	1214500	540030	1245	Q8CIH5	1245	Q8CIH5	Q8CIH5	1-phosphatidylinositol 4,5-bisphosphate phosphodiesterase gamma-2	Plcg2	ALVKEFNVNENQLQLYQEKCNRRLREKRVSN
0.53993	0.46571	0.9122	0.48566	0.42252	0.89737	1.028	0.84942	0.81137	1.3	0.56009	0.4848	1.4091	1.5633	1.0941	NaN	NaN	NaN	0.639672	0.913993	1.4091	NaN	NaN	NaN	0.798653	0.642347	0.902968	Y	2			___1	0.999142	1.3669e-06	122.52	60.554	122.52	0.060441	14919000	6156500	5194000	3568600	2833	Q9QXS1	2833	Q9QXS1	Q9QXS1	Plectin	Plec	QGHTTVAELTQREDVYRYLKGRSSIAGLLLK
0.72661	0.81877	1.1409	0.78347	0.96695	1.1695	0.92329	1.5005	1.6643	NaN	NaN	NaN	1.116	1.2467	1.0665	1.1139	1.126	0.9989	0.802118	0.937647	1.116	0.888099	1.0011	1.1139	0.824717	1.04499	1.24092	Y	3			___1	1	3.93569e-11	132.15	93.377	81.574	-0.62082	17356000	5577000	5824700	5953900	512	Q9DC11	512	Q9DC11	Q9DC11	Plexin domain-containing protein 2	Plxdc2	RWPAMKFRRGSGHPAYAEVEPVGEKEGFIVS
0.82596	1.0697	1.1166	0.67693	0.79437	1.0854	NaN	NaN	NaN	NaN	NaN	NaN	NaN	NaN	NaN	NaN	NaN	NaN	NaN	NaN	NaN	NaN	NaN	NaN	0.751445	0.932035	1.101	Y	2			___1	1	0.00130302	85.161	35.738	77.732	0.24581	4756900	1786200	1900100	1070600	10	P35700	10	P35700	P35700	Peroxiredoxin-1	Prdx1	______MSSGNAKIGYPAPNFKATAVMPDGQ
0.77446	0.82752	1.1558	0.77414	0.85425	1.0255	NaN	NaN	NaN	NaN	NaN	NaN	NaN	NaN	NaN	NaN	NaN	NaN	NaN	NaN	NaN	NaN	NaN	NaN	0.7743	0.840885	1.09065	Y	2			___1	0.99946	1.28879e-10	121.45	76.521	101.08	-0.084857	9764900	3713700	3415900	2635400	195	P68404	195	P68404	P68404	Protein kinase C beta type	Prkcb	AKNLVPMDPNGLSDPYVKLKLIPDPKSESKQ
28.858	24.556	0.73384	26.819	22.112	0.81024	4.8066	6.9475	1.1606	4.9005	6.9229	1.2005	1.5921	0.096218	0.051418	1.5958	0.09687	0.050341	10.3931	19.4484	1.5921	10.3231	19.8645	1.5958	14.35	16.6419	1.18218	Y	2			___1	1	6.85643e-120	273.52	221.41	262.5	0.18349	611290000	133250000	360290000	117750000	311	P28867	311	P28867	P28867	Protein kinase C delta type;Protein kinase C delta type regulatory subunit;Protein kinase C delta type catalytic subunit	Prkcd	QRSSRKLDTTESVGIYQGFEKKPEVSGSDIL
2.3433	1.6882	0.63409	1.8122	1.4234	0.7204	1.6132	0.96401	0.69332	1.5494	0.98236	0.81631	NaN	NaN	NaN	NaN	NaN	NaN	NaN	NaN	NaN	NaN	NaN	NaN	1.82953	1.26449	0.71603	Y	3			___1	0.964994	2.0789e-06	100.77	61.775	100.77	0.21198	6679200	1607000	3268100	1804000	332	P28867	332	P28867	P28867	Protein kinase C delta type;Protein kinase C delta type regulatory subunit;Protein kinase C delta type catalytic subunit	Prkcd	KPEVSGSDILDNNGTYGKIWEGSTRCTLENF
1.0695	1.1653	1.1443	1.041	1.2038	1.1747	1.1107	0.9662	1.0214	1.1594	1.0728	1.0433	0.92529	0.97536	0.97283	0.8518	0.87266	0.97104	1.02526	1.02793	0.92529	1.14592	1.02982	0.8518	1.09196	1.07764	1.0268	Y	2			___1	0.986672	1.05366e-112	267.22	221.65	240.91	-0.038539	8355000000	2611200000	2850300000	2893500000	849	Q61136	849	Q61136	Q61136	Serine/threonine-protein kinase PRP4 homolog	Prpf4b	DFGSASHVADNDITPYLVSRFYRAPEIIIGK
0.95087	0.90026	1.0938	0.86334	1.0591	1.1901	NaN	NaN	NaN	NaN	NaN	NaN	NaN	NaN	NaN	NaN	NaN	NaN	NaN	NaN	NaN	NaN	NaN	NaN	0.907105	0.97968	1.14195	Y	3			___1	0.999102	7.15335e-12	150.69	97.136	123.26	0.44192	7091900	1998500	2639500	2453900	76	P49722	76	P49722	P49722	Proteasome subunit alpha type-2	Psma2	SVHKVEPITKHIGLVYSGMGPDYRVLVHRAR
1.1112	1.5879	1.0418	0.93018	1.0164	1.0581	NaN	NaN	NaN	NaN	NaN	NaN	0.72089	0.94052	1.1557	0.71261	0.76329	1.3087	1.06324	0.865276	0.72089	1.31012	0.764117	0.71261	1.10368	1.05842	0.88335	Y	2			___1	1	0.00023046	98.523	33.766	98.523	-0.18203	13154000	4686300	4489800	3978400	57	P49722	57	P49722	P49722	Proteasome subunit alpha type-2	Psma2	NGVVLATEKKQKSILYDERSVHKVEPITKHI
0.94563	0.96131	1.0774	0.91376	1.0623	1.1583	1.2516	1.1322	1.0264	1.1524	1.4253	1.0248	1.0944	1.1482	0.98334	1.0267	1.0766	0.99348	0.870928	1.01694	1.0944	0.92885	1.00656	1.0267	1.01053	1.10077	1.068	Y	3			___1	1	1.26055e-09	154.67	117.49	125.82	-0.00249	51887000	16306000	18929000	16652000	126	P17225	126	P17225	P17225	Polypyrimidine tract-binding protein 1	Ptbp1	NYYTSVAPVLRGQPIYIQFSNHKELKTDSSP
0.87674	1.2645	1.4936	1.2757	1.2689	0.96967	1.7352	2.325	1.2803	1.3924	1.7845	1.2838	1.7016	0.99947	0.54813	NaN	NaN	NaN	1.00053	1.82438	1.7016	NaN	NaN	NaN	1.25611	1.69346	1.34579	Y	3			___1	0.999346	0.00111331	99.669	45.721	73.927	-0.6007	7683000	2028300	3200300	2454400	98	Q8BHD7	98	Q8BHD7	Q8BHD7	Polypyrimidine tract-binding protein 3	Ptbp3	NYYTPVTPHLRSQPVYIQYSNHRELKTDNLP
NaN	NaN	NaN	NaN	NaN	NaN	3.3773	1.7125	0.48589	2.2846	1.6878	0.74304	NaN	NaN	NaN	NaN	NaN	NaN	NaN	NaN	NaN	NaN	NaN	NaN	2.83095	1.70015	0.614465	Y	2			___1	0.846121	0.00453404	96.143	46.428	72.243	0.13347	766820	106050	424560	236200	579	Q9QVP9	579	Q9QVP9	Q9QVP9	Protein-tyrosine kinase 2-beta	Ptk2b	KLGDFGLSRYIEDEDYYKASVTRLPIKWMSP
NaN	NaN	NaN	NaN	NaN	NaN	NaN	NaN	NaN	NaN	NaN	NaN	1.465	0.61908	0.43502	1.9852	1.6253	0.57042	1.6153	2.29874	1.465	0.615271	1.75309	1.9852	1.11529	2.02592	1.7251	Y	3			___1	0.96049	0.000435903	101.66	44.133	101.66	-0.40428	20986000	6810900	10395000	3779800	546	P35235	546	P35235	P35235	Tyrosine-protein phosphatase non-receptor type 11	Ptpn11	RRIEEEQKSKRKGHEYTNIKYSLVDQTSGDQ
0.84294	0.92398	1.1117	0.94243	1.0708	1.082	1.0392	1.0116	1.0222	NaN	NaN	NaN	NaN	NaN	NaN	0.86895	1.2189	1.3487	NaN	NaN	NaN	0.820412	0.741455	0.86895	0.911245	0.936959	1.02121	Y	2			___1	0.984301	1.22346e-35	191.15	143.04	176.17	0.55705	37480000	12700000	13381000	11399000	62	P35235	62	P35235	P35235	Tyrosine-protein phosphatase non-receptor type 11	Ptpn11	RNGAVTHIKIQNTGDYYDLYGGEKFATLAEL
4.5238	3.3497	0.73569	7.1296	5.6764	0.814	2.3353	1.5826	0.78968	2.3462	1.6564	0.77913	1.6175	0.15483	0.09446	1.6237	0.15629	0.090773	6.4587	10.5865	1.6175	6.39836	11.0165	1.6237	4.86533	5.64468	1.05995	Y	3			___1	0.999305	1.71088e-65	213.83	179.65	91.812	0.42064	351740000	70878000	203760000	77099000	381	Q61152	381	Q61152	Q61152	Tyrosine-protein phosphatase non-receptor type 18	Ptpn18	TGPGPRAPTSTDTPIYSQVAPRAQRPVAHTE
6.9292	12.236	1.7222	7.1376	12.648	1.686	3.2087	4.0768	1.3148	3.684	5.7669	1.5306	1.3511	NaN	NaN	1.356	NaN	NaN	NaN	NaN	1.3511	NaN	NaN	1.356	5.23988	8.68192	1.5634	Y	3			___1	0.999999	2.70064e-15	156.11	99.545	77.633	0.10627	38345000	7098000	18840000	12407000	64	P29351	64	P29351	P29351	Tyrosine-protein phosphatase non-receptor type 6	Ptpn6	VTHIRIQNSGDFYDLYGGEKFATLTELVEYY
0.7199	1.1385	1.6471	0.74217	1.0371	1.1504	NaN	NaN	NaN	NaN	NaN	NaN	1.7486	0.86206	0.47571	1.6457	0.64807	0.41403	1.16001	2.10212	1.7486	1.54304	2.41528	1.6457	1.04128	1.67325	1.54795	Y	2			___1	0.997245	1.27025e-10	127.2	82.808	101.3	-0.032491	20320000	5351000	10323000	4645500	536	P29351	536	P29351	P29351	Tyrosine-protein phosphatase non-receptor type 6	Ptpn6	KKLEIIQSQKGQESEYGNITYPPAVRSAHAK
NaN	NaN	NaN	0.71594	0.76594	0.91391	NaN	NaN	NaN	NaN	NaN	NaN	1.2001	0.59143	0.59741	1.8869	1.4436	0.46301	1.69082	1.67389	1.2001	0.692713	2.15978	1.8869	1.03316	1.5332	1.33364	Y	4			___1	1	5.27137e-14	162.31	101.14	85.522	0.075669	73988000	23227000	34977000	15784000	564	P29351	564	P29351	P29351	Tyrosine-protein phosphatase non-receptor type 6	Ptpn6	HAKASRTSSKHKEEVYENVHSKSKKEEKVKK
0.9834	0.99603	1.2401	0.86796	0.77214	0.97299	NaN	NaN	NaN	NaN	NaN	NaN	NaN	NaN	NaN	NaN	NaN	NaN	NaN	NaN	NaN	NaN	NaN	NaN	0.92568	0.884085	1.10655	Y	2			___1	0.929628	0.00010781	88.311	54.653	88.311	-0.14643	3434700	1114800	1331100	988740	301	P29351	301	P29351	P29351	Tyrosine-protein phosphatase non-receptor type 6	Ptpn6	RVILQGRDSNIPGSDYINANYVKNQLLGPDE
1.1327	1.0682	0.96976	1.0023	1.0227	0.96218	0.81194	0.72917	0.89749	0.82231	0.76491	0.93423	0.93361	1.1882	1.1352	0.98877	1.2148	1.1688	0.841609	0.880902	0.93361	0.823181	0.855578	0.98877	0.905673	0.88691	0.947673	Y	3			___1	1	1.25972e-86	241.32	164	153.41	-0.15019	263710000	85357000	92077000	86280000	825	P18052	825	P18052	P18052	Receptor-type tyrosine-protein phosphatase alpha	Ptpra	FCYKVVQEYIDAFSDYANFK___________
1.0879	1.4879	1.0757	1.3943	1.6856	1.0419	1.5373	1.2534	1.0276	1.2035	1.302	1.0461	NaN	NaN	NaN	0.89319	0.73262	1.1048	NaN	NaN	NaN	1.36496	0.905141	0.89319	1.31759	1.32681	1.0169	Y	3			___1	0.998926	1.93678e-27	177.44	125.43	121.95	0.26083	11738000	4411600	3897200	3429600	695	P49446	695	P49446	P49446	Receptor-type tyrosine-protein phosphatase epsilon	Ptpre	FCYKVVQDFIDIFSDYANFK___________
0.80662	0.89623	1.0984	0.77735	0.9397	1.1767	2.6376	3.4383	1.1814	3.3583	4.4384	1.2984	1.0696	1.2077	1.1556	1.0516	1.2889	1.1609	0.82802	0.865351	1.0696	0.775855	0.861401	1.0516	1.53062	1.90656	1.14602	Y	2			___1	1	2.27316e-08	149.72	102.18	76.064	-0.38104	23515000	7111900	7699500	8703200	171	Q8R143	171	Q8R143	Q8R143	Pituitary tumor-transforming gene 1 protein-interacting protein	Pttg1ip	DEIRKKYGLFKEQNPYEKF____________
0.79192	0.84088	1.0987	1.082	1.2425	1.0726	NaN	NaN	NaN	NaN	NaN	NaN	NaN	NaN	NaN	NaN	NaN	NaN	NaN	NaN	NaN	NaN	NaN	NaN	0.93696	1.04169	1.08565	Y	3			___1	1	0.000514529	82.202	51.421	82.202	0.29513	3360700	1131100	1238600	991010	197	Q8CI94	197	Q8CI94	Q8CI94	Glycogen phosphorylase, brain form	Pygb	DWLRYGNPWEKARPEYMLPVHFYGRVEHTPD
0.80069	1.0042	1.0856	0.77212	0.87923	1.0564	NaN	NaN	NaN	NaN	NaN	NaN	NaN	NaN	NaN	NaN	NaN	NaN	NaN	NaN	NaN	NaN	NaN	NaN	0.786405	0.941715	1.071	Y	4			___1	0.999999	9.22985e-19	145.99	87.3	77.221	-0.74806	18027000	6942500	6619800	4465100	183	P51150	183	P51150	P51150	Ras-related protein Rab-7a	Rab7a	TIARNALKQETEVELYNEFPEPIKLDKNDRA
1.3376	1.386	0.99823	1.294	1.3403	1.0105	0.96394	1.0739	1.1659	1.0562	1.2347	1.2076	0.90836	1.0593	1.0425	1.0237	0.93779	0.92055	0.94402	0.959233	0.90836	1.06634	1.08631	1.0237	1.11035	1.18007	1.05238	Y	2			___1	1	7.52353e-53	215.09	179.97	187.63	-0.39085	33719000	11033000	11845000	10841000	1349	Q9ERU9	1349	Q9ERU9	Q9ERU9	E3 SUMO-protein ligase RanBP2;Putative peptidyl-prolyl cis-trans isomerase	Ranbp2	GNLNFEFQIVKKEGPYWNCNSCSFKNAATAK
2.3484	3.6612	1.5483	2	3.2445	1.4778	2.0286	3.0542	1.4499	2.061	2.8196	1.5398	1.3695	0.59447	0.40478	1.5391	0.56734	0.37705	1.68217	2.47048	1.3695	1.76261	2.65217	1.5391	1.98046	2.98369	1.4874	Y	3			___1	0.791591	7.6938e-41	178.56	138.12	113.78	-0.090397	57292000	13081000	25507000	18705000	328	Q9WUB0	328	Q9WUB0	Q9WUB0	RanBP-type and C3HC4-type zinc finger-containing protein 1	Rbck1	NSQEAEVACPFIDSTYSCPGKLLEREIRALL
1.286	1.3389	1.1076	1.0732	1.0668	0.95032	NaN	NaN	NaN	NaN	NaN	NaN	NaN	NaN	NaN	NaN	NaN	NaN	NaN	NaN	NaN	NaN	NaN	NaN	1.1796	1.20285	1.02896	Y	3			___1	1	9.46756e-07	124.38	70.14	124.38	-0.081695	5379400	1527900	2255800	1595800	290	P47911	290	P47911	P47911	60S ribosomal protein L6	Rpl6	LQGYLRSQFSLTNGMYPHKLVF_________
1.8711	2.207	1.1943	2.5166	2.9705	1.1648	2.8365	3.1108	1.3917	1.6555	1.9636	1.4145	1.7033	0.64739	0.37539	1.461	0.68214	0.45051	1.54466	2.6639	1.7033	1.46597	2.21971	1.461	1.98172	2.52258	1.38827	Y	2			___1	0.997996	8.13371e-73	245.39	189.63	214.58	0.37861	34358000	9646800	16822000	7889100	179	P57725;P59808	179;563	P57725;P59808	P57725	SAM domain-containing protein SAMSN-1;SAM and SH3 domain-containing protein 1	Samsn1;Sash1	FCGRAKVHTDFTPSPYDTDSLKIKKGDIIDI;FCGRARVHTDFTPSPYDTDSLKLKKGDIIDI
1.6236	1.9362	1.1937	1.371	1.5525	1.1696	0.97315	1.3795	1.3663	1.0688	1.5421	1.3746	1.1973	0.87115	0.66272	1.3441	0.79623	0.60667	1.14791	1.50893	1.1973	1.25592	1.64834	1.3441	1.24006	1.5946	1.27427	Y	2			___1	0.999866	1.89163e-72	241.39	198.71	241.39	0.70829	190910000	51659000	78314000	60936000	189	Q8K352	189	Q8K352	Q8K352	SAM and SH3 domain-containing protein 3	Sash3	FCGRARVHTDFTPSPYDHDSLKLQKGDVIQI
1.375	2.7378	2.0879	1.1633	2.8726	2.4233	NaN	NaN	NaN	NaN	NaN	NaN	NaN	NaN	NaN	NaN	NaN	NaN	NaN	NaN	NaN	NaN	NaN	NaN	1.26915	2.8052	2.2556	Y	2			___1	0.999143	0.00553719	84.653	57.524	81.346	0.75981	3243200	705560	1069600	1468000	102	Q60604	102	Q60604	Q60604	Adseverin	Scin	DYLGGKPVQSRELQGYESTDFVGYFKGGLKY
1.7131	2.168	1.2277	1.4843	2.1158	1.4435	3.0138	3.4089	1.0435	3.0808	2.9985	1.1537	2.9551	1.0907	0.35092	1.8158	0.50313	0.27414	0.916842	2.84965	2.9551	1.98756	3.64777	1.8158	2.03273	2.86477	1.60655	Y	2			___1	0.992547	7.06642e-139	282.52	221.25	265.43	0.20295	73328000	14165000	40744000	18418000	423	P98083	423	P98083	P98083	SHC-transforming protein 1	Shc1	PPPPCPGRELFDDPSYVNIQNLDKARQAGGG
0.9587	1.1668	1.197	0.94095	1.241	1.214	NaN	NaN	NaN	NaN	NaN	NaN	NaN	NaN	NaN	NaN	NaN	NaN	NaN	NaN	NaN	NaN	NaN	NaN	0.949825	1.2039	1.2055	Y	2			___1	0.990356	1.3311e-26	195.36	134.96	177.78	-0.015048	12210000	3743400	4557900	3908800	142	Q3UUV5	142	Q3UUV5	Q3UUV5	Src kinase-associated phosphoprotein 1	Skap1	EWQKRWCVISRGLFLYYANEKSKQPKGTFLI
0.95071	1.0732	1.1379	0.80622	0.97451	1.2227	NaN	NaN	NaN	1.019	1.1301	0.99106	NaN	NaN	NaN	NaN	NaN	NaN	NaN	NaN	NaN	NaN	NaN	NaN	0.92531	1.05927	1.11722	Y	3			___1	0.993019	1.06141e-14	171.67	125.9	118.77	0.29041	11212000	4012000	3954000	3246100	151	Q3UND0	151	Q3UND0	Q3UND0	Src kinase-associated phosphoprotein 2	Skap2	EWQKRWCALSKTVFYYYGSDKDKQQKGEFAI
1.0751	1.0914	1.0015	0.79085	0.67337	0.85216	1.564	1.4016	1.1008	1.2465	1.3847	0.97502	0.89384	0.76423	0.86206	0.94557	0.90474	0.87362	1.30851	1.16001	0.89384	1.10529	1.14466	0.94557	1.18171	1.14262	0.961482	Y	2			___1	0.999966	1.18437e-09	159.44	83.28	103.91	-0.10505	30178000	11191000	10950000	8037500	197	Q3UND0	197	Q3UND0	Q3UND0	Src kinase-associated phosphoprotein 2	Skap2	KKDCCFEICAPDKRIYQFTAASPKDAEEWVQ
NaN	NaN	NaN	NaN	NaN	NaN	0.44475	0.20173	0.51342	0.57967	0.21589	0.47799	NaN	NaN	NaN	NaN	NaN	NaN	NaN	NaN	NaN	NaN	NaN	NaN	0.51221	0.20881	0.495705	Y	3			___1	0.999945	3.14149e-14	112.06	87.133	112.06	1.498	8684800	6589600	1382200	713000	237	Q3UND0	237	Q3UND0	Q3UND0	Src kinase-associated phosphoprotein 2	Skap2	GSDVIPEDDEERGELYDDVDHPAAVSSPQRS
0.82433	0.81064	1.0069	0.86544	0.86146	1.1791	NaN	NaN	NaN	NaN	NaN	NaN	NaN	NaN	NaN	NaN	NaN	NaN	NaN	NaN	NaN	NaN	NaN	NaN	0.844885	0.83605	1.093	Y	2			___1	0.853355	0.000230278	88.224	64.648	88.224	0.038312	3258500	1089600	1207800	961140	156	Q924N4	156	Q924N4	Q924N4	Solute carrier family 12 member 6	Slc12a6	DTRPKVSSLLNRMANYTNLTQGAKEHEEAEN
0.97727	1.0393	1.2125	0.80171	1.2981	1.4369	NaN	NaN	NaN	NaN	NaN	NaN	NaN	NaN	NaN	NaN	NaN	NaN	NaN	NaN	NaN	NaN	NaN	NaN	0.88949	1.1687	1.3247	Y	2			___1	0.997189	6.29398e-05	99.752	56.669	87.667	-0.1953	4881400	1231500	1212600	2437300	195	P51881	195	P51881	P51881	ADP/ATP translocase 2;ADP/ATP translocase 2, N-terminally processed	Slc25a5	SVQGIIIYRAAYFGIYDTAKGMLPDPKNTHI
1.0012	1.0404	1.0224	0.87554	1.4231	1.5106	0.95793	1.0159	1.115	NaN	NaN	NaN	NaN	NaN	NaN	NaN	NaN	NaN	NaN	NaN	NaN	NaN	NaN	NaN	0.94489	1.1598	1.216	Y	3			___1	0.974792	1.01482e-17	134.04	103.33	109.65	-0.082093	7378500	2301400	2599900	2477300	41	Q8CFE6	41	Q8CFE6	Q8CFE6	Sodium-coupled neutral amino acid transporter 2	Slc38a2	FNYSYPTKQAALKSHYADVDPENQNFLLESN
1.0672	1.1489	1.0219	1.0362	1.2684	1.1255	NaN	NaN	NaN	NaN	NaN	NaN	NaN	NaN	NaN	NaN	NaN	NaN	NaN	NaN	NaN	NaN	NaN	NaN	1.0517	1.20865	1.0737	Y	3			___1	1	0.000849308	89.08	55.107	64.224	0.25906	3965500	1168900	1438200	1358500	126	Q62376	126	Q62376	Q62376	U1 small nuclear ribonucleoprotein 70 kDa	Snrnp70	NYDTTESKLRREFEVYGPIKRIHMVYSKRSG
1.0844	1.1198	0.98631	0.76402	0.8835	1.0474	NaN	NaN	NaN	NaN	NaN	NaN	1.0126	1.0708	1.0649	NaN	NaN	NaN	0.933881	0.939055	1.0126	NaN	NaN	NaN	0.927434	0.980785	1.01544	Y	3			___1	0.923373	4.0396e-05	100.73	41.179	89.747	-0.027575	5521300	1949900	1963000	1608400	293	Q924S8	293	Q924S8	Q924S8	Sprouty-related, EVH1 domain-containing protein 1	Spred1	DSSVPFSKQDSKKSDYLYHCGDETKLSSLKD
NaN	NaN	NaN	NaN	NaN	NaN	0.98794	0.70025	0.56915	NaN	NaN	NaN	2.4424	0.33485	0.1259	2.171	0.30051	0.1274	2.98641	7.94281	2.4424	3.32768	7.84929	2.171	2.43401	5.49745	1.72752	Y	2			___1	0.93527	0.000115288	110.39	79.316	72.289	-0.1396	15520000	4098000	9603300	1819000	424	P05480	424	P05480	P05480	Neuronal proto-oncogene tyrosine-protein kinase Src	Src	KVADFGLARLIEDNEYTARQGAKFPIKWTAP
4.3053	2.6925	0.53827	5.9313	4.1835	0.64877	3.242	2.0646	0.66815	3.0383	2.3008	0.74534	1.0298	NaN	NaN	1.138	NaN	NaN	NaN	NaN	1.0298	NaN	NaN	1.138	4.12922	2.81035	0.650132	Y	3			___1	1	1.06118e-46	199.67	156.43	199.67	0.039692	161670000	70911000	81873000	8887100	170	Q9JM90	170	Q9JM90	Q9JM90	Signal-transducing adaptor protein 1	Stap1	LPLMPPEKEKEPVQDYADVLNPLPECFYAVS
0.99935	0.77105	0.81717	0.77884	0.75324	0.96981	1.4974	1.5314	1.0217	1.4986	1.3313	0.97465	1.4513	1.252	0.83196	1.1634	1.0926	0.90052	0.798722	1.20198	1.4513	0.915248	1.11047	1.1634	1.08136	1.11657	1.06634	Y	3			___1	0.999944	1.05388e-28	153.17	114.58	153.17	0.048363	16931000	5370300	6848900	4712100	705	P42227	705	P42227	P42227	Signal transducer and activator of transcription 3	Stat3	ESQEHPEADPGSAAPYLKTKFICVTPTTCSN
0.90781	1.0319	0.95569	0.77014	0.79803	1.0458	1.1704	1.0714	0.87277	0.95891	0.77377	0.74205	1.1814	0.71496	0.58747	1.1672	0.75177	0.61664	1.39868	1.70221	1.1814	1.33019	1.62169	1.1672	1.08936	1.1665	0.994152	Y	3			___1	1	3.08327e-19	178.53	143.48	94.409	0.07737	1113500000	388280000	476840000	248420000	694	P42230	694	P42230	P42230	Signal transducer and activator of transcription 5A	Stat5a	FAKYYTPVLAKAVDGYVKPQIKQVVPEFVNA
1.0265	0.93342	0.87008	1.1023	1.254	0.98228	1.2405	0.85643	0.62055	1.0689	0.80483	0.6668	1.1091	0.67253	0.55786	1.1623	0.69472	0.59674	1.48692	1.79256	1.1091	1.43943	1.67577	1.1623	1.22743	1.2195	0.901852	Y	3			___1	1	1.1751e-05	140.78	86.836	67.334	-0.16965	1176200000	407710000	512980000	255470000	699	P42232	699	P42232	P42232	Signal transducer and activator of transcription 5B	Stat5b	TPVPCEPATAKAADGYVKPQIKQVVPEFANA
0.93082	0.95285	1.1056	0.71743	1.0258	1.4841	NaN	NaN	NaN	NaN	NaN	NaN	NaN	NaN	NaN	1.1657	1.2117	0.99967	NaN	NaN	NaN	0.825287	1.00033	1.1657	0.824512	0.992993	1.2518	Y	3			___1	0.99605	4.35121e-15	127.49	97.269	127.49	0.043378	5950000	2081200	2033300	1835400	115	P70452	115	P70452	P70452	Syntaxin-4	Stx4	QLKAIEPQKEEADENYNSVNTRMKKTQHGVL
0.87695	0.8831	1.0606	0.84739	0.91393	1.2337	0.8787	1.0368	1.3272	NaN	NaN	NaN	NaN	NaN	NaN	NaN	NaN	NaN	NaN	NaN	NaN	NaN	NaN	NaN	0.86768	0.94461	1.20717	Y	3			___1	0.992543	0.000430556	77.42	51.834	77.42	-0.0074953	17601000	6110400	6086400	5404700	251	P70452	251	P70452	P70452	Syntaxin-4	Stx4	EMINRIEKNILSSADYVERGQEHVKIALENQ
1.7224	2.7823	1.3702	3.2113	4.4215	1.6984	NaN	NaN	NaN	NaN	NaN	NaN	1.475	0.31432	0.20209	1.515	0.31897	0.20612	3.18147	4.94829	1.475	3.13509	4.85154	1.515	2.81257	4.25091	1.51465	Y	2			___1	1	0.000218744	130.69	60.145	108.56	0.092959	20550000	6506600	10704000	3339100	517	Q6A028	517	Q6A028	Q6A028	Switch-associated protein 70	Swap70	QLEQLELERKQALEQYEGVKKKLEMATHMTK
NaN	NaN	NaN	0.61448	0.5437	0.82148	NaN	NaN	NaN	NaN	NaN	NaN	1.6285	0.275	0.17187	1.7097	0.30378	0.15214	3.63636	5.81835	1.6285	3.29186	6.57289	1.7097	2.51423	4.31165	1.38656	Y	3			___1	0.902254	0.00326843	113.62	58.64	113.62	-0.17825	17310000	6451800	9083500	1774300	290	P48025	290	P48025	P48025	Tyrosine-protein kinase SYK	Syk	PVTWSPGGIISRIKSYSFPKPGHKKPAPPQG
4.3249	4.0131	0.95148	6.2943	6.3267	0.88242	5.3252	5.4734	1.1517	3.984	6.6198	1.4443	1.6863	0.077677	0.045861	1.7144	0.059413	0.044432	12.8738	21.805	1.6863	16.8313	22.5063	1.7144	8.27226	11.1241	1.3051	Y	2			___1	1	0.000114286	136.5	82.496	63.864	-0.60814	101650000	22113000	58797000	20737000	520	P48025	520	P48025	P48025	Tyrosine-protein kinase SYK	Syk	SDFGLSKALRADENYYKAQTHGKWPVKWYAP
0.90973	0.95876	1.0648	1.0391	0.68348	0.6519	2.1517	1.3561	0.69977	1.7202	1.2536	0.73893	2.1004	0.432	0.18874	2.2163	0.27274	0.14745	2.31482	5.29829	2.1004	3.6665	6.78196	2.2163	1.96701	2.72203	1.24535	Y	4			___1	0.997246	2.88607e-10	106.38	85.85	78.451	0.12523	92444000	24089000	58798000	9557700	317	P48025	317	P48025	P48025	Tyrosine-protein kinase SYK	Syk	PPQGSRPESTVSFNPYEPTGGPWGPDRGLQR
1.5184	1.3931	0.92661	2.0832	1.5459	0.77777	3.5487	2.6875	0.82079	3.1907	3.1694	0.9764	1.7319	0.33315	0.18671	1.8394	0.28829	0.14548	3.00165	5.3559	1.7319	3.46873	6.8738	1.8394	2.8019	3.50427	1.17881	Y	3			___1	0.999639	8.01946e-86	239.13	186.95	174.7	0.047224	118530000	34754000	68965000	14814000	346	P48025	346	P48025	P48025	Tyrosine-protein kinase SYK	Syk	QREALPMDTEVYESPYADPEEIRPKEVYLDR
46.529	47.705	1.0391	55.518	58.444	1.0785	26.334	26.582	1.1701	49.348	51.859	1.1819	NaN	NaN	NaN	1.2527	0.030785	0.024918	NaN	NaN	NaN	32.4834	40.1316	1.2527	42.0425	44.9443	1.14446	Y	2			___1	0.931434	0.00347136	106.2	41.545	96.113	0.73664	481810000	37792000	256830000	187190000	624	P48025	624	P48025	P48025	Tyrosine-protein kinase SYK	Syk	NRPGFTAVELRLRNYYYDVVN__________
16.983	15.275	0.94543	20.746	19.251	0.94289	11.649	9.6251	0.86179	9.4319	9.9695	0.93143	1.2506	0.029513	0.022839	1.2657	0.034572	0.028297	33.8834	43.7848	1.2506	28.9251	35.3394	1.2657	20.2697	22.2075	1.03297	Y	2			___1	1	1.75832e-06	159.83	113.76	63.864	-0.60814	275960000	82929000	155240000	37792000	519	P48025	519	P48025	P48025	Tyrosine-protein kinase SYK	Syk	ISDFGLSKALRADENYYKAQTHGKWPVKWYA
1.7923	1.9863	1.0254	1.7309	1.7669	0.96226	3.8411	3.038	0.85804	2.5938	2.7056	0.99521	1.3456	0.361	0.25214	0.9012	0.26818	0.29773	2.77008	3.96605	1.3456	3.72884	3.35875	0.9012	2.74284	2.8036	1.01462	Y	3			___1	0.998687	1.04126e-27	170.14	125.79	168.05	-0.26929	38986000	11744000	20081000	7161300	342	P48025	342	P48025	P48025	Tyrosine-protein kinase SYK	Syk	DRGLQREALPMDTEVYESPYADPEEIRPKEV
1.1655	NaN	NaN	1.0043	0.66318	0.63292	0.60115	0.42269	0.7144	0.75518	0.45469	0.62005	1.0739	0.14847	0.13125	1.192	0.16205	0.13026	6.73537	7.61905	1.0739	6.17093	7.67695	1.192	3.05339	3.36731	0.846654	Y	2			___1	0.997106	4.94364e-32	196.33	131.16	196.33	-0.072813	21449000	9353600	9990000	2105800	518	P24604	518	P24604	P24604	Tyrosine-protein kinase Tec	Tec	KVSDFGMARYVLDDQYTSSSGAKFPVKWCPP
0.68775	1.0649	1.7179	1.2174	1.3226	1.1906	NaN	NaN	NaN	NaN	NaN	NaN	NaN	NaN	NaN	NaN	NaN	NaN	NaN	NaN	NaN	NaN	NaN	NaN	0.952575	1.19375	1.45425	Y	2			___1	0.981869	2.87325e-05	98.902	79.798	98.902	-0.22528	2020500	639350	616010	765150	483	Q8CGB6	483	Q8CGB6	Q8CGB6	Tensin-like C1 domain-containing phosphatase	Tenc1	DGALAHTRGPLDGSPYAQVQRVPRQTPPAPS
NaN	NaN	NaN	NaN	NaN	NaN	0.98508	0.97382	1.0208	1.0322	1.1206	1.1308	NaN	NaN	NaN	NaN	NaN	NaN	NaN	NaN	NaN	NaN	NaN	NaN	1.00864	1.04721	1.0758	Y	2			___1	0.999999	8.66717e-29	159.67	119.98	159.67	0.67885	9319700	2676900	3487400	3155500	617	P21981	617	P21981	P21981	Protein-glutamine gamma-glutamyltransferase 2	Tgm2	LVAEVSLKNPLSDPLYDCIFTVEGAGLTKEQ
1.023	1.0832	0.94507	1.0172	1.2844	1.0718	1.1372	0.96203	0.98536	NaN	NaN	NaN	0.91504	0.95335	0.99718	0.93109	1.0056	0.99832	1.04893	1.00283	0.91504	0.994431	1.00168	0.93109	1.04415	1.06683	0.969672	Y	2			___1	0.995019	1.67696e-23	186.13	151.74	162.48	-0.17537	20044000	5738600	7504900	6800800	369	P21981	369	P21981	P21981	Protein-glutamine gamma-glutamyltransferase 2	Tgm2	WQAIDPTPQEKSEGTYCCGPVSVRAIKEGDL
0.82727	0.78527	0.96164	NaN	NaN	NaN	1.4517	1.8939	1.3687	1.1305	1.5537	1.4882	NaN	NaN	NaN	NaN	NaN	NaN	NaN	NaN	NaN	NaN	NaN	NaN	1.13649	1.41096	1.27285	Y	2			___1	0.9887	7.00026e-06	102.08	61.769	74.428	-0.57792	2175200	654340	648220	872670	26	P26039	26	P26039	P26039	Talin-1	Tln1	GNVVKTMQFEPSTMVYDACRMIRERIPEALA
0.89809	1.0307	1.1631	0.84232	0.91014	1.0529	NaN	NaN	NaN	NaN	NaN	NaN	NaN	NaN	NaN	NaN	NaN	NaN	NaN	NaN	NaN	NaN	NaN	NaN	0.870205	0.97042	1.108	Y	2			___1	0.991997	0.000382613	93.162	59.113	93.162	-0.011052	4241900	1406200	1653800	1182000	70	P26039	70	P26039	P26039	Talin-1	Tln1	DPKKGIWLEAGKALDYYMLRNGDTMEYRKKQ
0.88138	1.1367	1.1686	0.85721	0.99318	1.0714	0.79443	0.78687	0.99753	0.9525	0.91305	0.96985	1.1304	0.80328	0.70732	1.0844	0.77517	0.67244	1.2449	1.41379	1.1304	1.29004	1.48712	1.0844	1.00341	1.12178	1.07036	Y	2			___1	1	2.04722e-09	158.58	106.94	158.58	-0.0039913	148890000	51600000	59065000	38226000	160	Q8C4Q9	160	Q8C4Q9	Q8C4Q9	Transmembrane protein 154	Tmem154	EELDKWMNSMNRNADYECLPTLKEEKEPNPS
1.1409	0.98655	1.0351	0.73983	0.97815	1.0948	NaN	NaN	NaN	NaN	NaN	NaN	NaN	NaN	NaN	NaN	NaN	NaN	NaN	NaN	NaN	NaN	NaN	NaN	0.940365	0.98235	1.06495	Y	2			___1	0.781972	1.54558e-08	114.21	75.832	114.21	0.17225	1926800	493060	784710	648980	774	Q91YT8	774	Q91YT8	Q91YT8	Transmembrane protein 63A	Tmem63a	LASERTALSPQQQQTYGAIRNISGTLPGQPV
0.8437	0.74319	1.0716	0.78663	0.68908	0.92931	NaN	NaN	NaN	NaN	NaN	NaN	NaN	NaN	NaN	NaN	NaN	NaN	NaN	NaN	NaN	NaN	NaN	NaN	0.815165	0.716135	1.00045	Y	3			___1	0.965264	0.000151317	117.02	81.499	106.4	-0.051941	14372000	5309900	5253000	3809200	263	P21845	263	P21845	P21845	Tryptase beta-2	Tpsb2	GCAQPNKPGIYTRVTYYLDWIHRYVPEHS__
1.0632	0.86294	0.83878	0.88192	0.93536	0.88169	NaN	NaN	NaN	NaN	NaN	NaN	NaN	NaN	NaN	NaN	NaN	NaN	NaN	NaN	NaN	NaN	NaN	NaN	0.97256	0.89915	0.860235	Y	3			___1	0.911695	6.28355e-05	88.385	67.072	64.705	0.45583	2703000	944460	997960	760600	97	P21845	97	P21845	P21845	Tryptase beta-2	Tpsb2	KSPQLFRVQLREQYLYYGDQLLSLNRIVVHP
0.92878	1.3627	1.2667	0.8459	1.0401	1.028	NaN	NaN	NaN	NaN	NaN	NaN	NaN	NaN	NaN	NaN	NaN	NaN	NaN	NaN	NaN	NaN	NaN	NaN	0.88734	1.2014	1.14735	Y	3			___1	1	0.00381442	70.942	38.576	70.942	-0.59193	3332800	1119000	978860	1235000	399	P05213;P68368;P68373;P68369;P05214;Q3UX10;Q9JJZ2	399;399;399;399;399;406;399	P05213;P68368;P68373;Q9JJZ2	P05213	Tubulin alpha-1B chain;Tubulin alpha-4A chain;Tubulin alpha-1C chain;Tubulin alpha-1A chain;Tubulin alpha-3 chain;Tubulin alpha chain-like 3;Tubulin alpha-8 chain	Tuba1b;Tuba4a;Tuba1c;Tuba1a;Tuba3a;Tubal3;Tuba8	IAEAWARLDHKFDLMYAKRAFVHWYVGEGME
0.99268	1.2826	1.2933	0.78676	1.0907	1.3144	0.80071	0.84511	1.1501	0.83754	1.0231	1.2313	1.149	0.95591	0.85221	1.2176	1.06	0.81328	1.04612	1.17342	1.149	0.943396	1.22959	1.2176	0.901202	1.10742	1.22595	Y	2			___1	0.999997	1.4192e-81	247.14	186.84	247.14	0.39935	82737000	26246000	29768000	26723000	420	P42682	420	P42682	P42682	Tyrosine-protein kinase TXK	Txk	KISDFGMARYVLDDEYISSSGAKFPVKWCPP
0.56703	0.59331	1.199	0.63209	0.65549	1.0009	NaN	NaN	NaN	NaN	NaN	NaN	NaN	NaN	NaN	1.371	0.94356	0.40324	NaN	NaN	NaN	1.05982	2.47991	1.371	0.752979	1.2429	1.1903	Y	3			___1	1	4.79601e-06	96.371	68.791	96.371	-0.15736	26388000	6241300	11303000	8844000	91	P42682	91	P42682	P42682	Tyrosine-protein kinase TXK	Txk	LPQEPPDERIQVKALYDFLPREPGNLALKRA
1.1569	1.1111	1.1993	0.78981	0.86686	1.0064	1.4199	1.0985	0.93266	1.4676	1.0544	0.89336	0.94218	1.5289	1.3623	NaN	NaN	NaN	0.654065	0.734053	0.94218	NaN	NaN	NaN	1.09765	0.972983	0.99478	Y	3			___1	0.999987	5.43774e-20	174.9	135.16	174.9	-0.13137	30041000	8446400	7307600	14287000	148	P42682	148	P42682	P42682	Tyrosine-protein kinase TXK	Txk	PSNYVTENRLANLEIYEWYHKNITRNQTERL
1.1563	1.0114	0.87145	0.86595	0.7315	0.78396	NaN	NaN	NaN	NaN	NaN	NaN	NaN	NaN	NaN	NaN	NaN	NaN	NaN	NaN	NaN	NaN	NaN	NaN	1.01112	0.87145	0.827705	Y	3			___1	0.999627	1.75294e-05	104.7	69.735	82.85	-0.62387	4014500	1511800	1696800	805920	214	P42682	214	P42682	P42682	Tyrosine-protein kinase TXK	Txk	SIKHYQIKKNDSGQWYITERHLFPSVPELIQ
1.0062	1.2285	1.2136	0.97495	1.0549	1.0459	NaN	NaN	NaN	NaN	NaN	NaN	0.86704	0.99938	1.0793	0.87998	0.90848	1.1192	1.00062	0.926526	0.86704	1.10074	0.893495	0.87998	1.02063	1.02586	1.00163	Y	2			___1	0.999998	0.000115282	100.82	51.603	84.507	0.11091	7265700	2358200	2529000	2378500	245	Q9JMH6	245	Q9JMH6	Q9JMH6	Thioredoxin reductase 1, cytoplasmic	Txnrd1	YRVALREKKVVYENAYGRFIGPHRIVATNNK
0.97599	1.2582	1.2714	0.93486	1.1473	1.1789	1.7601	1.4119	1.0267	1.5268	1.4196	1.0878	1.1596	0.96957	0.73095	1.0905	0.84114	0.71258	1.03139	1.36808	1.1596	1.18886	1.40335	1.0905	1.23633	1.33474	1.13582	Y	4			___1	0.999875	3.03591e-19	124.31	90.269	121.56	0.31399	70858000	23373000	24951000	22533000	92	O54885	92	O54885	O54885	TYRO protein tyrosine kinase-binding protein	Tyrobp	AEGTRKQHIAETESPYQELQGQRPEVYSDLN
NaN	NaN	NaN	NaN	NaN	NaN	NaN	NaN	NaN	NaN	NaN	NaN	6.0478	0.98123	0.054761	53.921	1.7736	0.031776	1.01913	18.2612	6.0478	0.563825	31.4703	53.921	0.791477	24.8657	29.9844	Y	2			___1	0.996484	0.000302588	150.15	104.78	139.38	0.088548	278290000	78401000	197430000	2466800	8	Q8BGG7	8	Q8BGG7	Q8BGG7	Ubiquitin-associated and SH3 domain-containing protein B	Ubash3b	________MAAREELYSKVTPRRDRLQRPGT
0.8158	1.0269	1.1136	0.80977	0.83026	1.0754	NaN	NaN	NaN	1.395	1.4122	1.074	NaN	NaN	NaN	NaN	NaN	NaN	NaN	NaN	NaN	NaN	NaN	NaN	1.00686	1.08979	1.08767	Y	2			___1	1	0.00183815	80.688	48.818	80.688	0.29905	3640800	1238600	1337000	1065200	468	Q9Z1Q9	468	Q9Z1Q9	Q9Z1Q9	Valine--tRNA ligase	Vars	TVTEAFVRLHEEGVIYRSTRLVNWSCTLNSA
1.061	1.1731	1.2643	1.0368	1.0421	1.0833	NaN	NaN	NaN	1.847	1.5901	0.93791	1.0146	1.2345	1.1161	0.93115	1.4261	1.474	0.810045	0.895977	1.0146	0.701213	0.678426	0.93115	1.09121	1.07594	1.04625	Y	2			___1	0.999995	1.18208e-06	115.83	66.194	115.83	-0.20891	15694000	4890300	5698800	5104900	39	P70460	39	P70460	P70460	Vasodilator-stimulated phosphoprotein	Vasp	LPAGTGPQAFSRVQIYHNPTANSFRVVGRKM
0.97558	0.86881	0.82383	1.0821	0.94627	0.8492	1.0159	1.8145	1.7541	NaN	NaN	NaN	NaN	NaN	NaN	NaN	NaN	NaN	NaN	NaN	NaN	NaN	NaN	NaN	1.02453	1.20986	1.14238	Y	3			___1	0.977967	4.32744e-15	128.66	96.78	128.66	0.051745	4494100	1413100	1716300	1364600	253	Q62465	253	Q62465	Q62465	Synaptic vesicle membrane protein VAT-1 homolog	Vat1	KHEVLKENGVTHPIDYHTTDYVDEIKKISPK
1.096	0.89385	0.76436	1.076	0.87604	0.78074	NaN	NaN	NaN	NaN	NaN	NaN	0.60752	0.94666	1.4814	0.49343	1.1384	2.17	1.05635	0.675037	0.60752	0.878426	0.46083	0.49343	1.02669	0.726439	0.661512	Y	3			___1	1	2.87169e-06	111.72	85.729	66.023	-0.25128	78953000	26096000	29847000	23011000	826	P27870	826	P27870	P27870	Proto-oncogene vav	Vav1	ILNKKGQQGWWRGEIYGRIGWFPSNYVEEDY
0.58156	0.70655	1.2225	0.83381	1.1034	1.2966	NaN	NaN	NaN	NaN	NaN	NaN	1.1273	0.98885	1.0809	1.0285	1.312	1.2228	1.01128	0.925155	1.1273	0.762195	0.817795	1.0285	0.79721	0.888225	1.16872	Y	3			___1	0.998767	4.91201e-05	89.669	64.082	77.795	-0.35077	13066000	3572900	4870600	4622700	692	Q64727	692	Q64727	Q64727	Vinculin	Vcl	SAARILLRNPGNQAAYEHFETMKNQWIDNVE
0.82515	0.86427	1.1133	NaN	NaN	NaN	0.90799	0.85692	1.0174	0.7177	0.76459	1.2736	NaN	NaN	NaN	1.8865	1.0397	0.51994	NaN	NaN	NaN	0.961816	1.9233	1.8865	0.853164	1.10227	1.3227	Y	2			___1	0.995839	1.4265e-12	158.93	113.26	158.93	0.34249	8063600	2819400	3006000	2238200	53	P20152	53	P20152	P20152	Vimentin	Vim	YSLGSALRPSTSRSLYSSSPGGAYVTRSSAV
0.95355	1.2437	1.204	1.021	1.1004	0.99635	NaN	NaN	NaN	NaN	NaN	NaN	NaN	NaN	NaN	NaN	NaN	NaN	NaN	NaN	NaN	NaN	NaN	NaN	0.987275	1.17205	1.10017	Y	3			___1	1	0.00110089	72.315	41.984	47.217	-0.068018	9639700	2944000	3842400	2853200	117	P20152	117	P20152	P20152	Vimentin	Vim	NEKVELQELNDRFANYIDKVRFLEQQNKILL
0.93968	1.155	1.1241	1.0692	1.0373	1.0363	1.0061	1.1302	1.1304	0.97219	0.98259	1.0855	1.2183	1.2983	1.2197	0.98166	1.3806	1.2868	0.770238	0.819874	1.2183	0.724323	0.777122	0.98166	0.913622	0.983681	1.09604	Y	3			___1	1	2.54013e-27	174.35	122.48	48.555	-0.3635	413210000	131500000	141820000	139890000	293	P70315	293	P70315	P70315	Wiskott-Aldrich syndrome protein homolog	Was	ISEAQLTDAETSKLIYDFIEDQGGLEAVRQE
1.0555	1.091	1.055	0.97005	1.2839	1.2321	1.0383	1.1714	1.1518	1.2845	1.1564	0.88281	NaN	NaN	NaN	NaN	NaN	NaN	NaN	NaN	NaN	NaN	NaN	NaN	1.08709	1.17567	1.08043	Y	2			___1	0.999132	5.1307e-12	135.57	106.08	135.57	0.23399	9113600	2779600	3470500	2863500	72	O88342	72	O88342	O88342	WD repeat-containing protein 1	Wdr1	HAHQVVVAKYAPSGFYIASGDISGKLRIWDT
1.1145	1.0679	0.89468	0.9678	1.0022	0.97864	1.0226	1.0943	0.99194	1.1884	1.1711	1.0449	NaN	NaN	NaN	NaN	NaN	NaN	NaN	NaN	NaN	NaN	NaN	NaN	1.07333	1.08387	0.97754	Y	3			___1	0.999998	6.38519e-51	185.62	154.91	185.62	-0.10609	30774000	9965400	11497000	9311800	238	O88342	238	O88342	O88342	WD repeat-containing protein 1	Wdr1	KVCALGESKAHDGGIYAISWSPDSTHLLSAS
2.6068	4.0029	1.4343	2.526	3.2311	1.2872	2.1674	2.3065	1.2645	2.1119	2.2774	1.2221	1.6502	0.61536	0.34832	1.4602	0.6482	0.43577	1.62506	2.87092	1.6502	1.54273	2.29479	1.4602	2.09665	2.8306	1.38642	Y	3			___1	0.999999	5.07057e-21	185.32	144.24	104.94	0.18402	148480000	33902000	66370000	48208000	100	P0DP28;P0DP27;P0DP26	100;100;100	P0DP28	P0DP28			EIREAFRVFDKDGNGYISAAELRHVMTNLGE
0.75975	0.69663	0.98926	0.65026	0.82065	1.2722	NaN	NaN	NaN	NaN	NaN	NaN	0.9849	0.85991	0.83124	NaN	NaN	NaN	1.16291	1.20302	0.9849	NaN	NaN	NaN	0.857641	0.906767	1.08212	Y	3			___1	0.998673	1.61459e-20	170.42	99.738	83.877	0.19046	10193000	4171200	3312500	2709700	119	Q3U7U4	119	Q3U7U4	Q3U7U4	Transmembrane protein C1orf162 homolog		NDLTRNHSSGLEPTIYSQIKVTDSDLPLP__
[truncated: 3 more columns]
